# Supplementary material for: Rapid switch-on fluorescent detection of nanomolar-level hydrazine in water by a diacetoxy-functionalized MOF: application in paper strips and environmental samples
Source: Royal Society of Chemistry journal article supplement (doi:10.1039/d0dt02491k), 2020-01-01
Supplement: d0dt02491k1.pdf [file d0dt02491k1.pdf]

## Supporting Information For

### **Rapid Switch-On Fluorescent Detection of Nanomolar Level Hydrazine in Water by a Diacetoxy Functionalized MOF: Application in Paper Strips and Environmental Samples**

*Soutick Nandi, Mostakim SK, and Shyam Biswas\**

Department of Chemistry, Indian Institute of Technology Guwahati, Guwahati, 781039 Assam, India

\* Corresponding author. Tel: 91-3612583309, Fax: 91-3612582349.

E-mail address: sbiswas@iitg.ac.in

**Materials and Characterization Methods.** The ligand 2,5-diacetoxy terephthalic acid ( $\text{H}_2\text{BDC}-(\text{OCOCH}_3)_2$ ) was achieved by following the previously reported procedure (Scheme S1).<sup>1</sup> A drastic naked eye color change was visualized during the product formation. 2,5-dihydroxyterephthalic acid ( $\text{H}_2\text{BDC}-(\text{OH})_2$ ) was bright yellow solid which was transformed to white solid compound when it was converted to 2,5-diacetoxy terephthalic acid (Figure S1). The  $^1\text{H}$  NMR and  $^{13}\text{C}$  NMR spectra of this ligand are shown in Figures S2-S3. All other required chemicals were purchased from commercial sources and used without purification. Fourier transform infrared (FT-IR) spectra were recorded with a Perkin Elmer Spectrum two FT-IR spectrometer in the range of  $440\text{--}4000\text{ cm}^{-1}$  with KBr pellet. The below mentioned indications were employed for the characterization of the absorption bands: medium (m), weak (w), broad (br), very strong (vs), strong (s) and shoulder (sh). Ambient temperature X-Ray powder diffraction (XRPD) patterns were collected on a Bruker D2 Phaser X-ray diffractometer (30 kV, 10 mA) using  $\text{Cu-K}\alpha$  ( $\lambda = 1.5406\text{ \AA}$ ) radiation. Lattice parameters were determined by using the DICVOL program<sup>2</sup> and refined by employing STOE's WinXPow software package.<sup>3</sup> FE-SEM images were captured with a Zeiss (Zemini) scanning electron microscope. Thermogravimetric analyses (TGA) were collected under air atmosphere at a heating rate of  $10\text{ }^\circ\text{C min}^{-1}$  in a temperature region of  $25\text{--}800\text{ }^\circ\text{C}$  by employing a Netzsch STA-409CD thermal analyzer. Fluorescence emission behavior was recorded by a HORIBA JOBIN YVON Fluoromax-4 spectrofluorometer. The excitation wavelength ( $\lambda_{\text{ex}}$ ) was 365 nm for all the fluorescence experiments. The nitrogen sorption isotherms were performed employing a Quantachrome Autosorb iQ-MP gas sorption analyzer at  $-196\text{ }^\circ\text{C}$ . Prior to the sorption measurement, degassing of the material was performed at  $90\text{ }^\circ\text{C}$  for 12 h under dynamic vacuum. A Bruker Avance III 600 spectrometer was utilized for recording  $^1\text{H}$  NMR at 400 MHz. Fluorescence lifetime measurements were performed by time correlated single-photon counting (TCSPC) method by an Edinburgh Instrument Life-Spec II instrument. The fluorescence decays were analyzed by reconvolution method using the FAST software provided by Edinburgh Instruments.

**Fluorescence Detection Assay in Aqueous Medium.** The probe (5 mg) was taken in a glass vial in mili-Q water (5 mL) was included. The suspension was sonicated for 1 h. A stable suspension was obtained after keeping for overnight at static condition. The above-mentioned suspension (200  $\mu\text{L}$ ) of the probe was added inside a quartz cuvette. Then, we have included 2800  $\mu\text{L}$  of mili-Q water to the suspension. All the fluorescence titration measurements were conducted by exciting the resulting suspension at 365 nm and recording the spectra within 385–710 nm. For time dependent fluorescence experiment, 500  $\mu\text{L}$  of 1 mM hydrazine ( $\text{NH}_2\text{NH}_2$ ) was introduced to the suspension of **1'** and in each minute, emission spectra were collected. To perform the concentration-dependent sensing event, 0 to 500  $\mu\text{L}$  of hydrazine (1 mM) solution was added gradually to aqueous suspension of **1'**. After each addition, the emission response of the resulting suspension was observed. To ensure the specificity of the compound towards hydrazine detection event was performed with several possible interfering analytes. 1 mM solution of different compositing analytes have been prepared by dissolving required amounts of compounds in 5 mL mili-Q water (i.e. NaF, NaBr, NaCl, NaI,  $\text{NaNO}_3$ ,  $\text{NaNO}_2$ , NaCN,  $\text{NaN}_3$ ,

NaSCN, NaHCO<sub>3</sub>, Na<sub>2</sub>SO<sub>4</sub>, Na<sub>2</sub>SO<sub>3</sub>, NaHSO<sub>3</sub>, NaHSO<sub>4</sub>, NaOAc, NaClO<sub>4</sub>, NH<sub>2</sub>OH, cysteine, aspartic acid, glucose, aspartic acid, serine and thiourea).

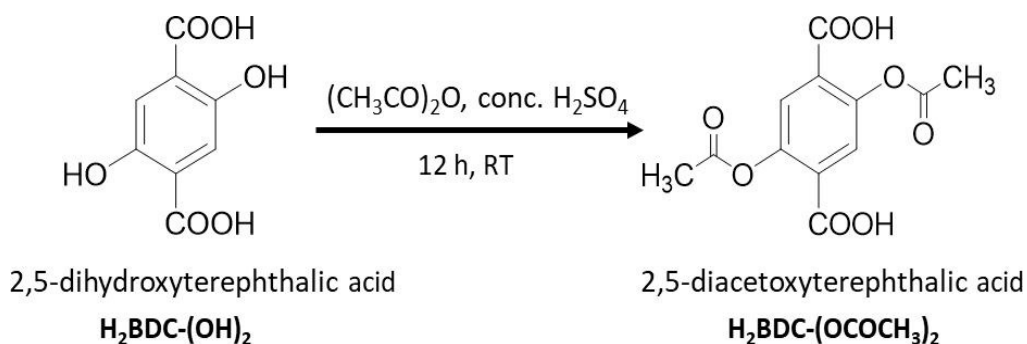

**Scheme S1.** Scheme for the preparation of 2,5-diacetoxy terephthalic acid (H<sub>2</sub>BDC-(OCOCH<sub>3</sub>)<sub>2</sub>).

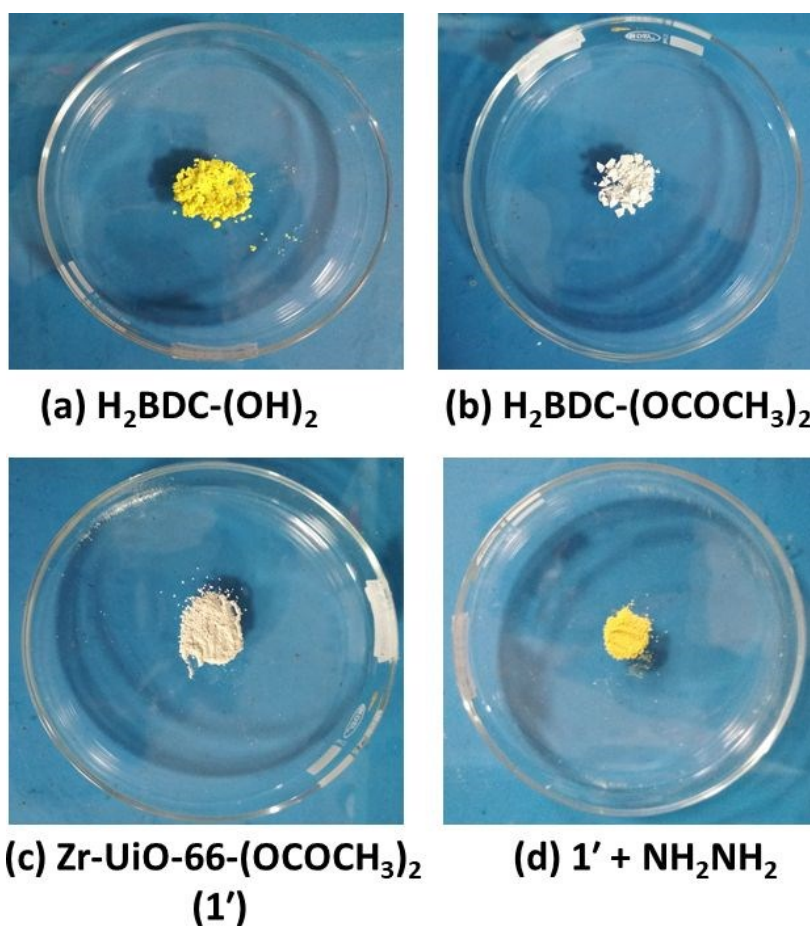

**Figure S1.** Photographs of (a) H<sub>2</sub>BDC-(OH)<sub>2</sub> ligand, (b) H<sub>2</sub>BDC-(OCOCH<sub>3</sub>)<sub>2</sub> ligand, (c) Zr-Uio-66-(OCOCH<sub>3</sub>)<sub>2</sub> MOF (1') and (d) hydrazine treated 1' (in bulk scale) under day light.

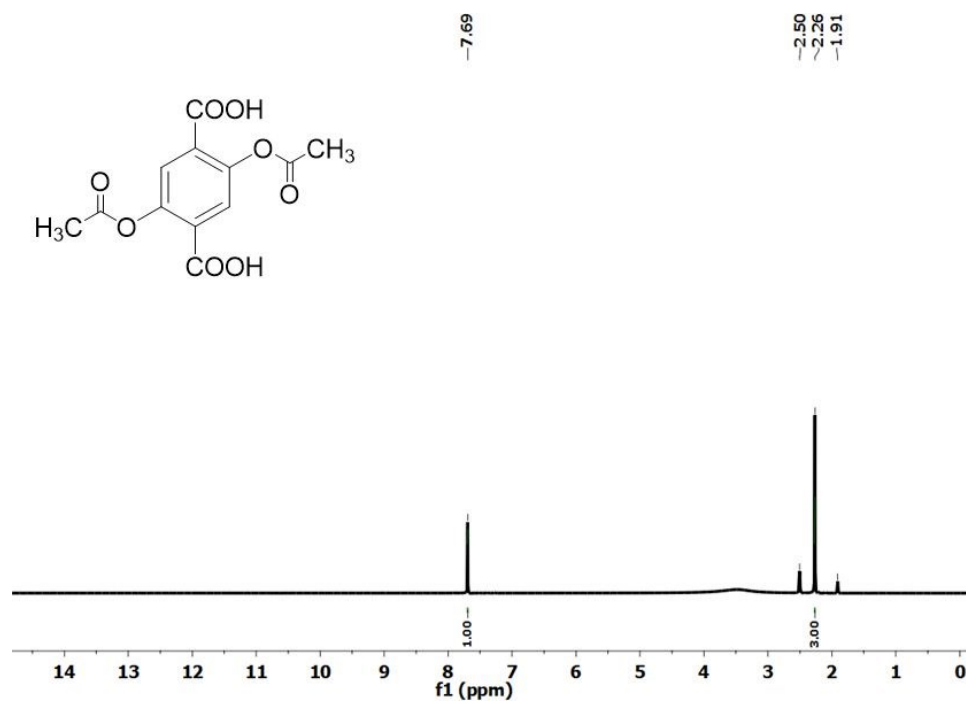

**Figure S2.**  $^1\text{H}$  NMR spectrum of  $\text{H}_2\text{BDC}-(\text{OCOCH}_3)_2$  ligand.

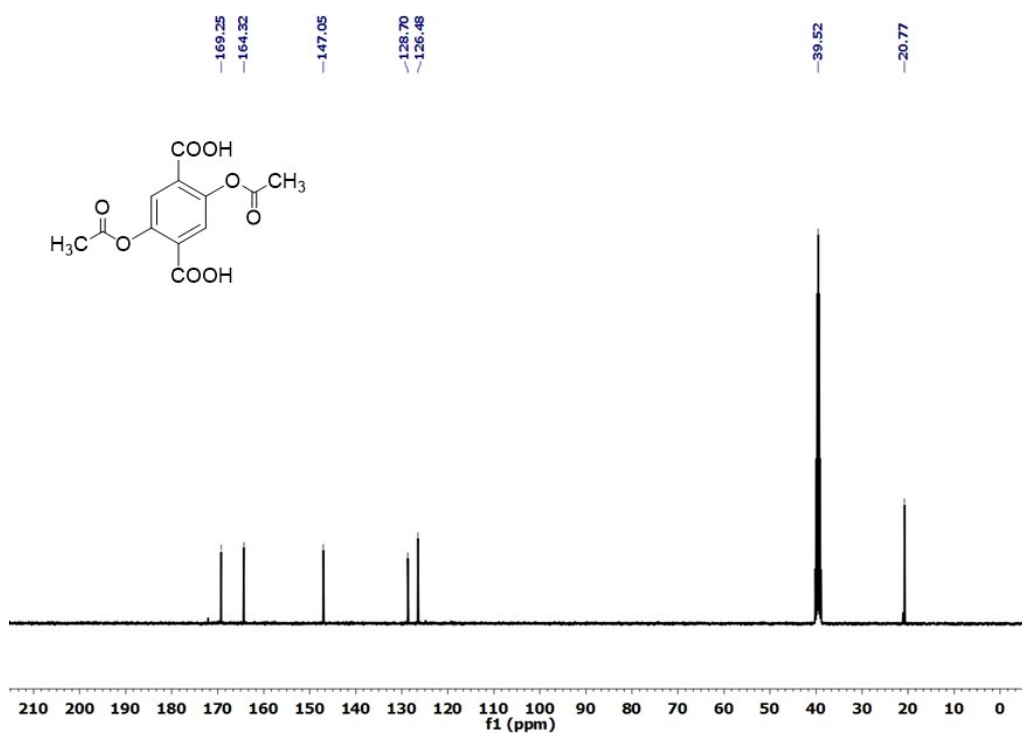

**Figure S3.**  $^{13}\text{C}$  NMR spectrum of  $\text{H}_2\text{BDC}-(\text{OCOCH}_3)_2$  ligand.

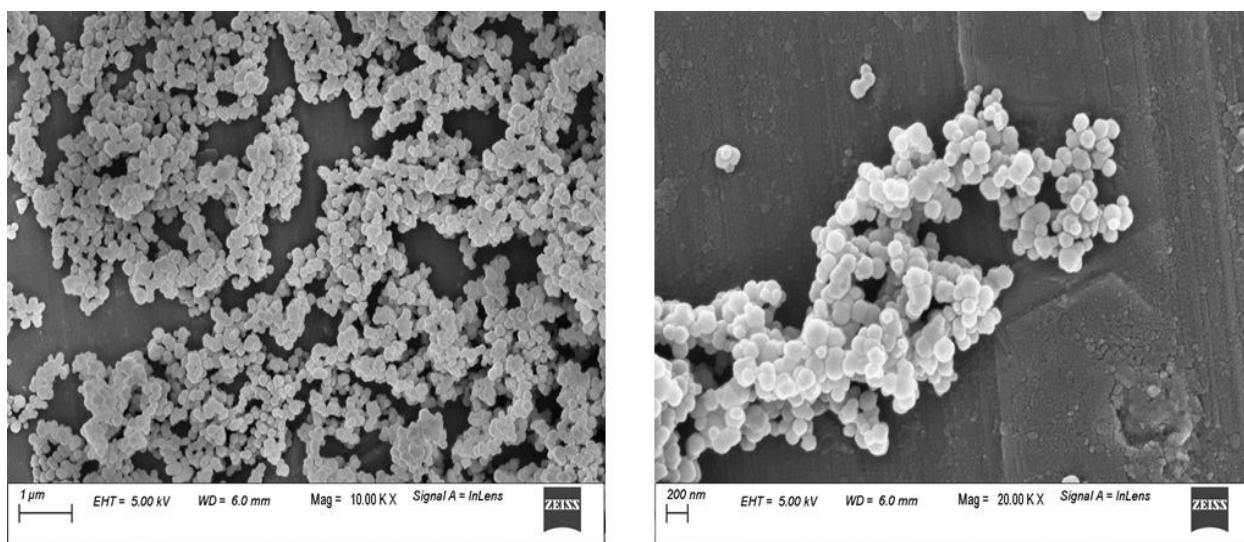

**Figure S4.** FE-SEM images of 1' under different magnifications.

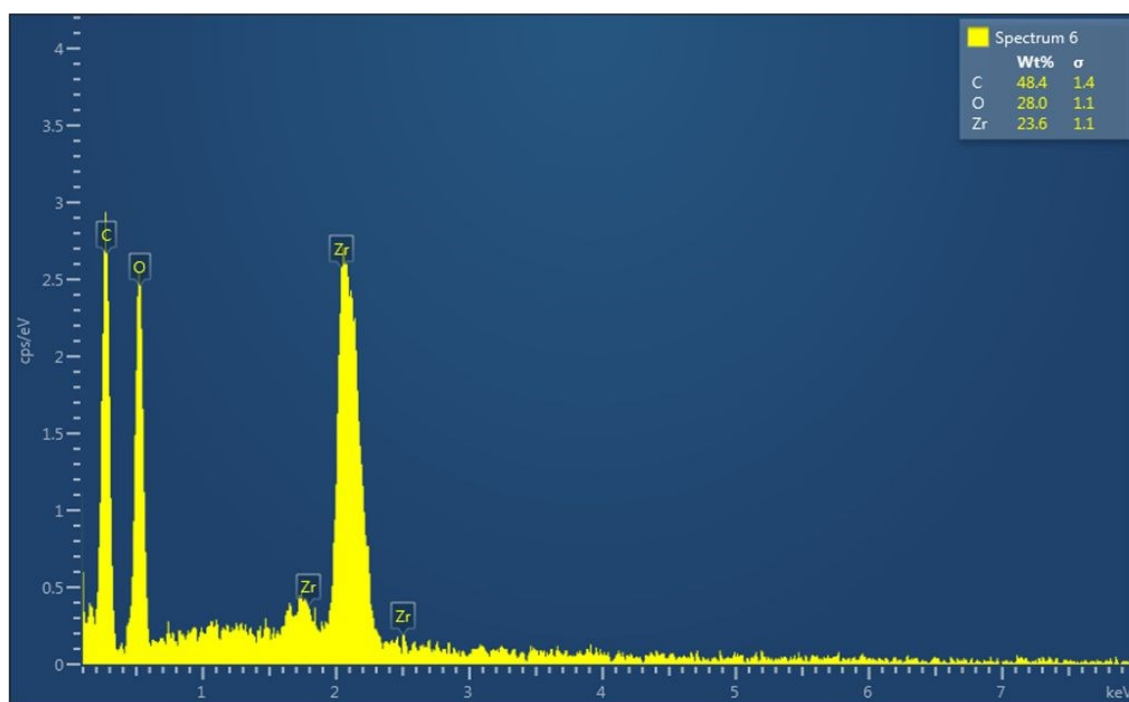

**Figure S5.** EDX spectrum of 1'.



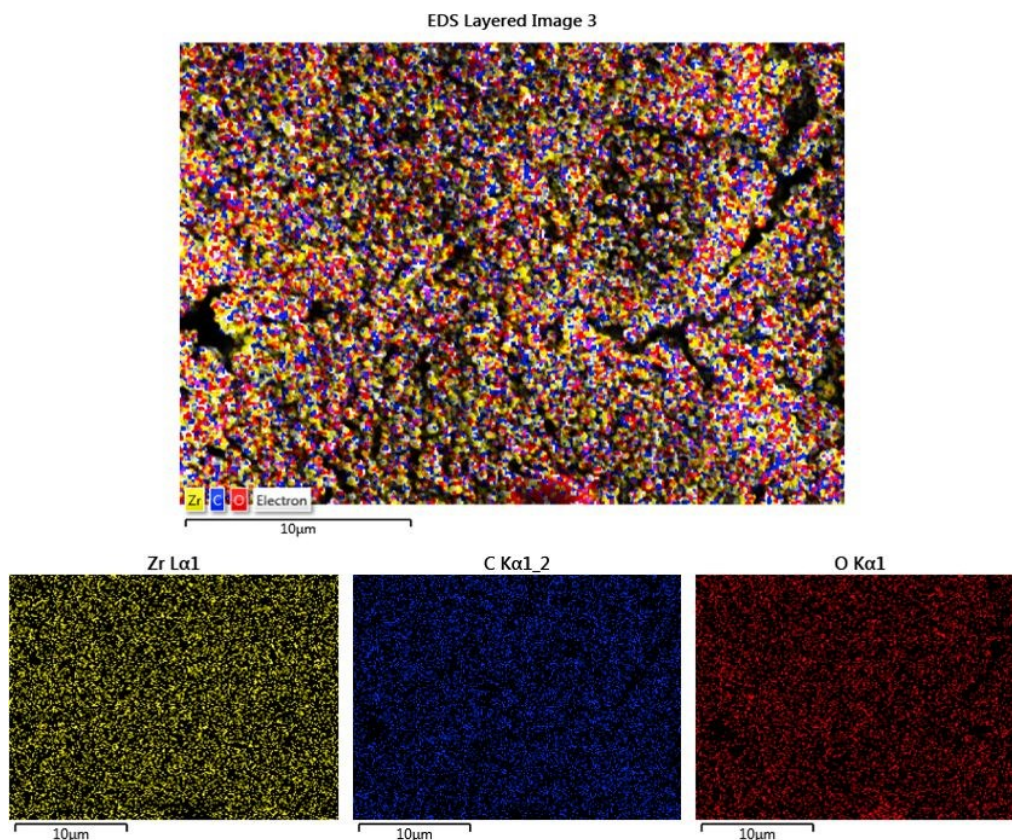

**Figure S6.** EDX elemental mapping of **1'**.

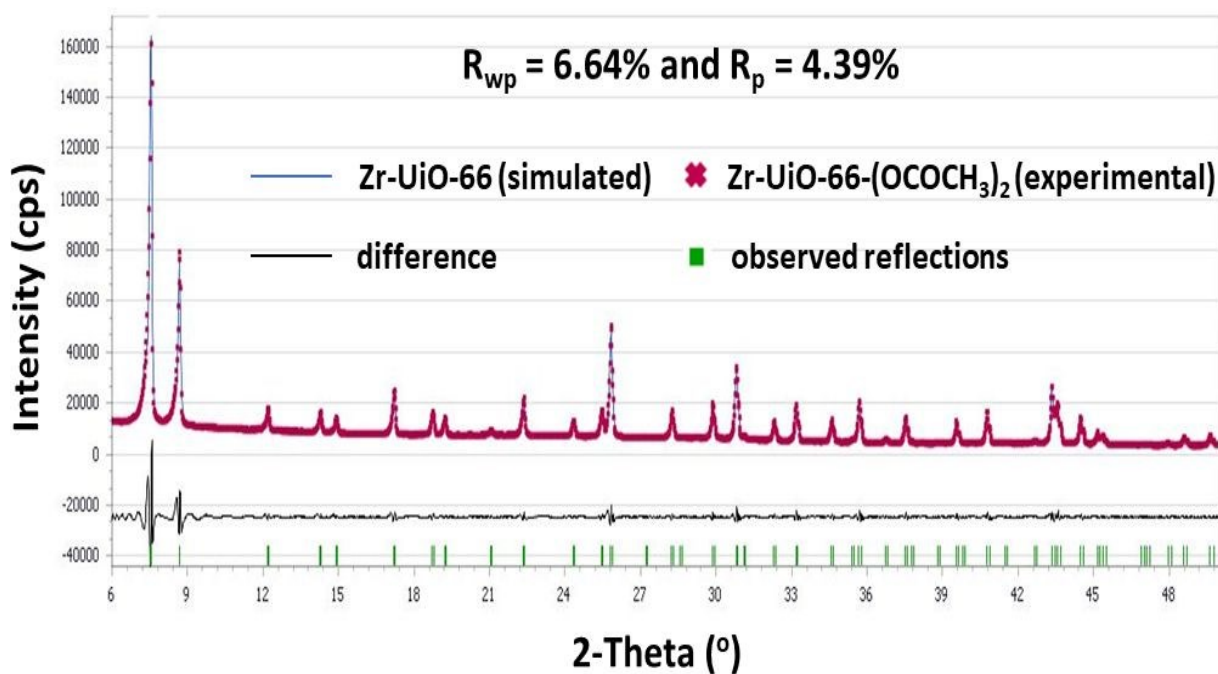

**Figure S7.** Pawley refinement for the XRPD pattern of as-synthesized **1**. Pink characters and blues lines denote experimental and simulated patterns, respectively. The peak positions and difference plot are displayed at the bottom ( $R_{wp} = 6.64\%$ ,  $R_p = 4.39\%$ ).

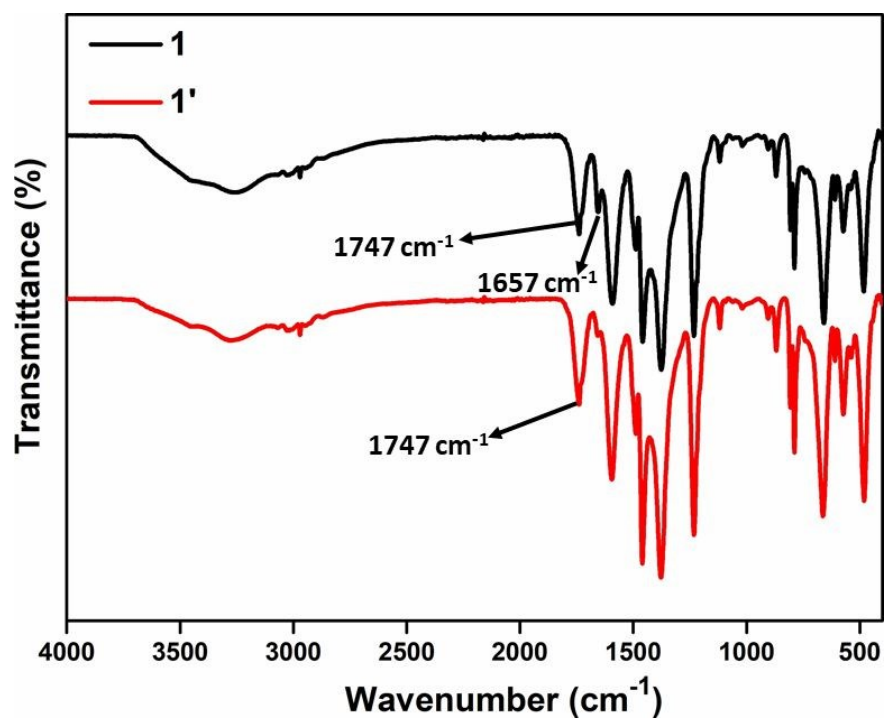

**Figure S8.** FT-IR spectra of as-synthesized **1** and thermally activated **1'**.

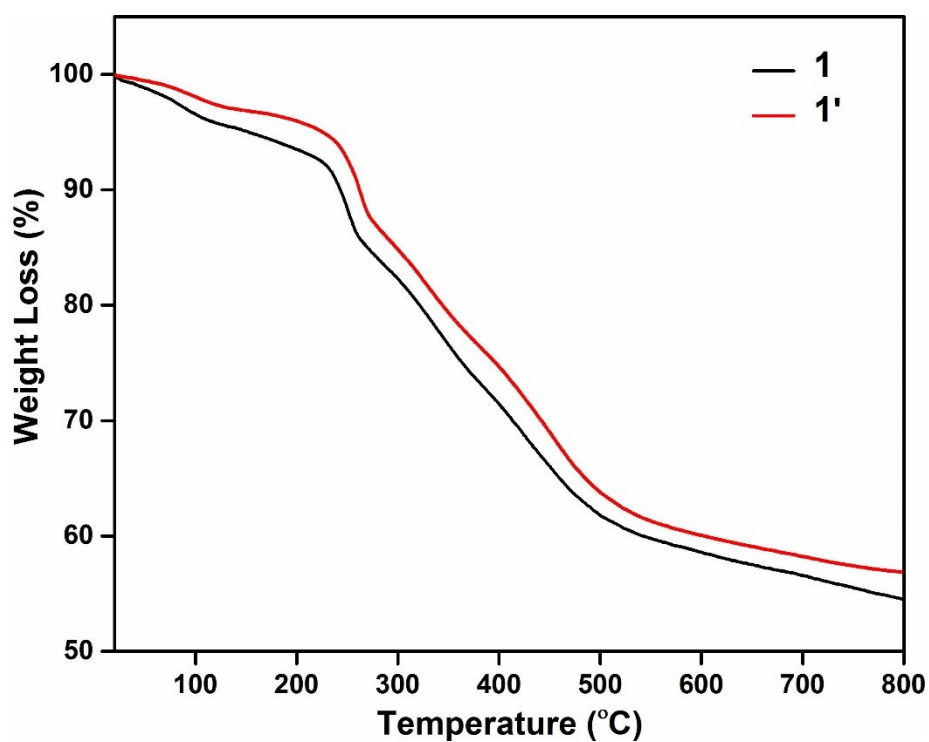

**Figure S9.** TG curves of as-synthesized **1** and activated **1'** measured in the temperature range of 25-700  $^{\circ}\text{C}$  at a heating rate of 10  $^{\circ}\text{C min}^{-1}$ .

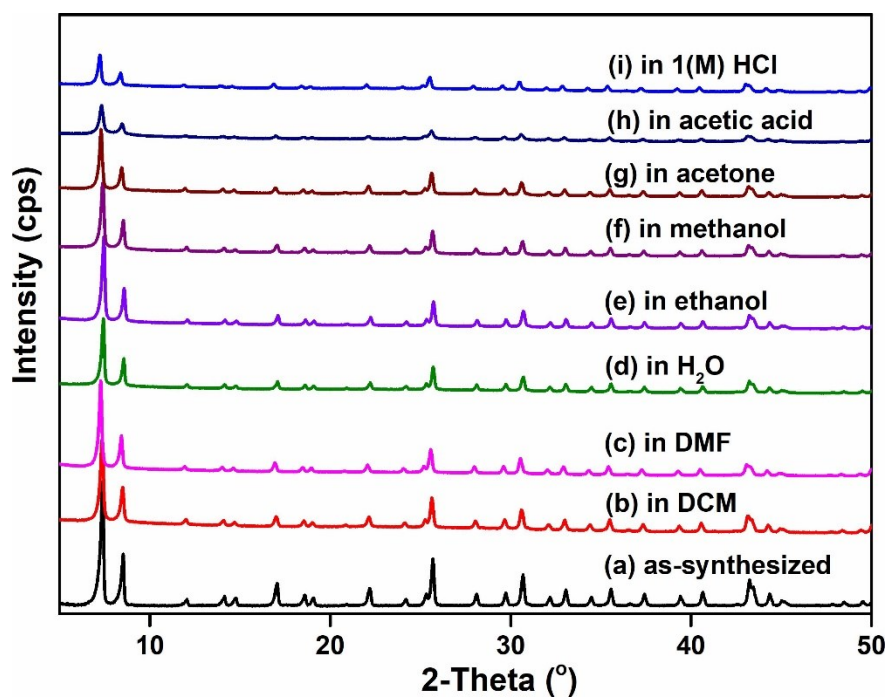

**Figure S10.** Experimental XRPD patterns of as-synthesized **1** (a), in DCM (b), in DMF (c), in water (d), in ethanol (e), in methanol (f), in acetone (g), in acetic acid (h) and in 1 (M) HCl (i).

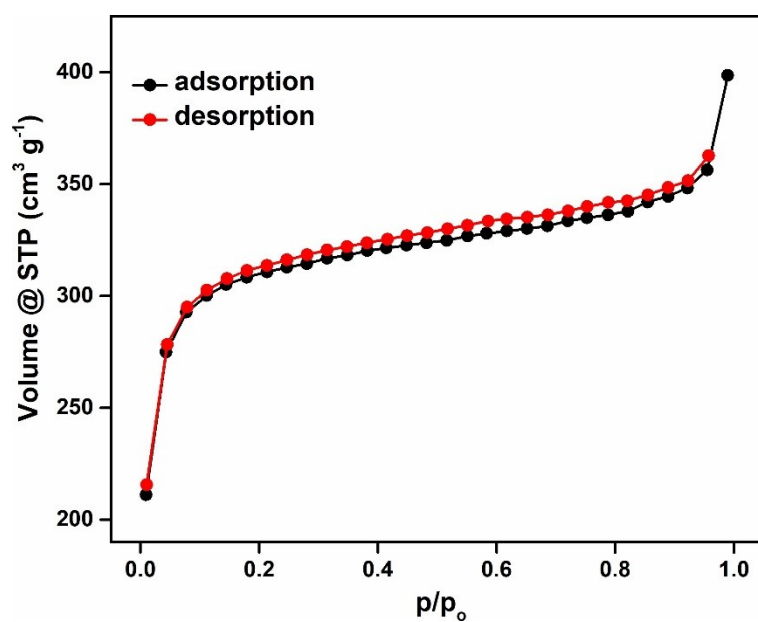

**Figure S11.** N<sub>2</sub> adsorption (solid black circles) and desorption (solid red circles) isotherms of **1'** measured at -196 °C.



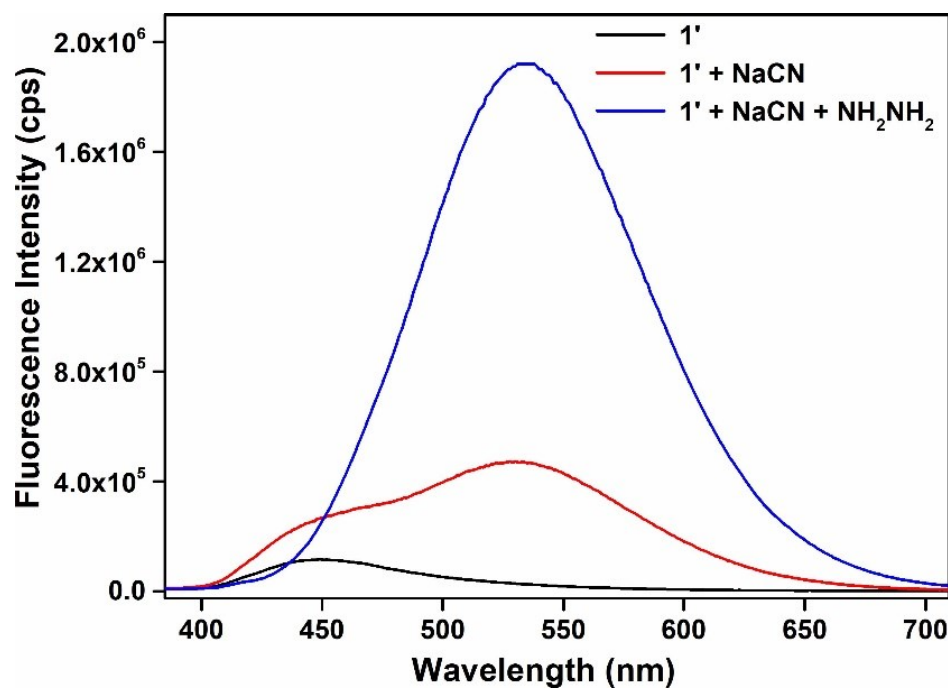

**Figure S12.** Change in the fluorescence emission intensity of **1'** upon addition of 1 mM hydrazine solution (500  $\mu$ L) in presence of 1 mM NaCN solution (500  $\mu$ L).

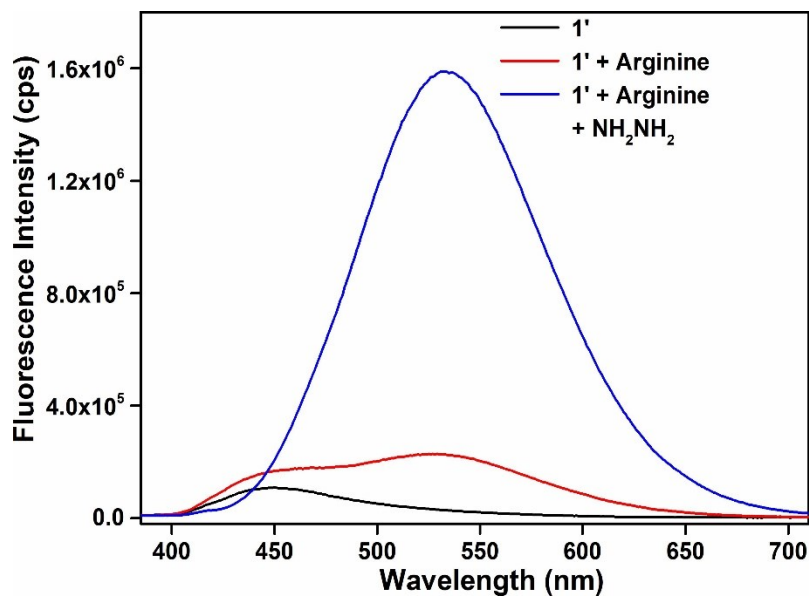

**Figure S13.** Change in the fluorescence emission intensity of **1'** upon addition of 1 mM hydrazine solution (500  $\mu$ L) in presence of 1 mM arginine solution (500  $\mu$ L).

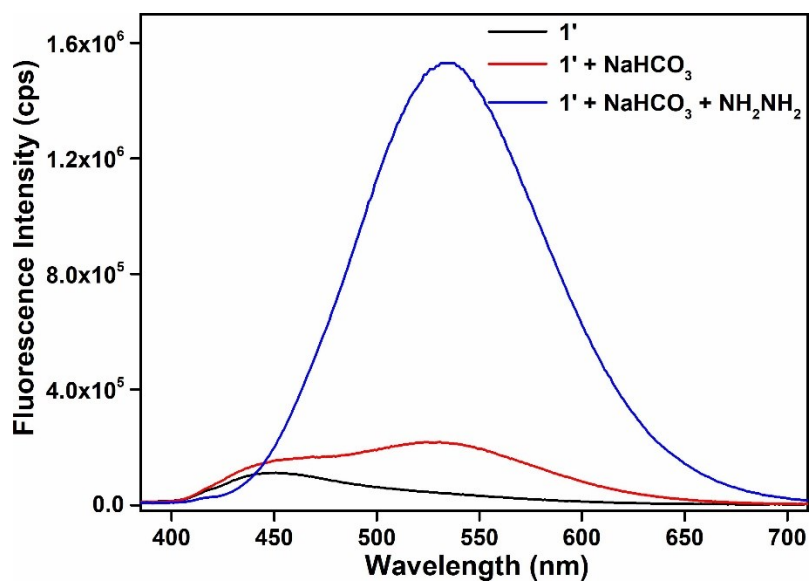

**Figure S14.** Change in the fluorescence emission intensity of **1'** upon addition of 1 mM hydrazine solution (500  $\mu$ L) in presence of 1 mM NaHCO<sub>3</sub> solution (500  $\mu$ L).

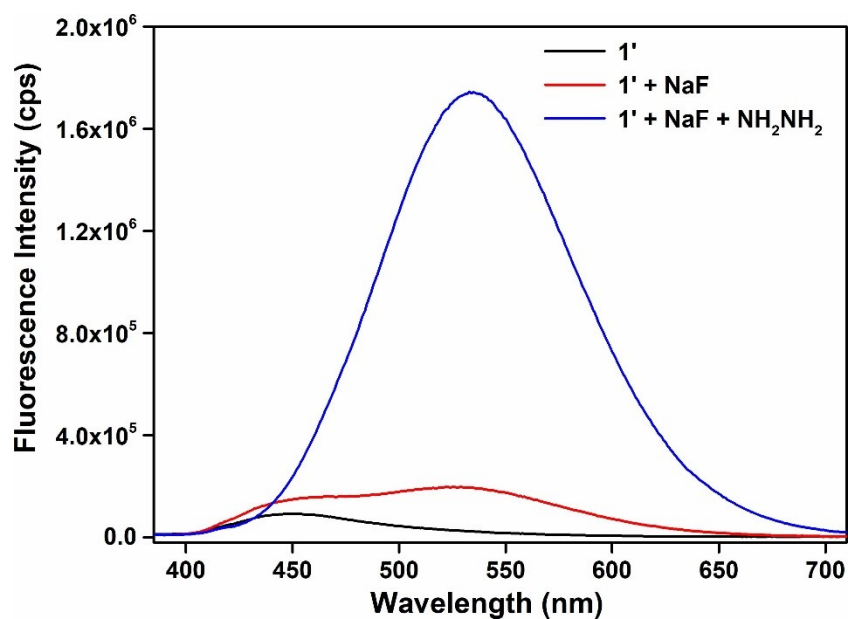

**Figure S15.** Change in the fluorescence emission intensity of **1'** upon addition of 1 mM hydrazine solution (500  $\mu$ L) in presence of 1 mM NaF solution (500  $\mu$ L).

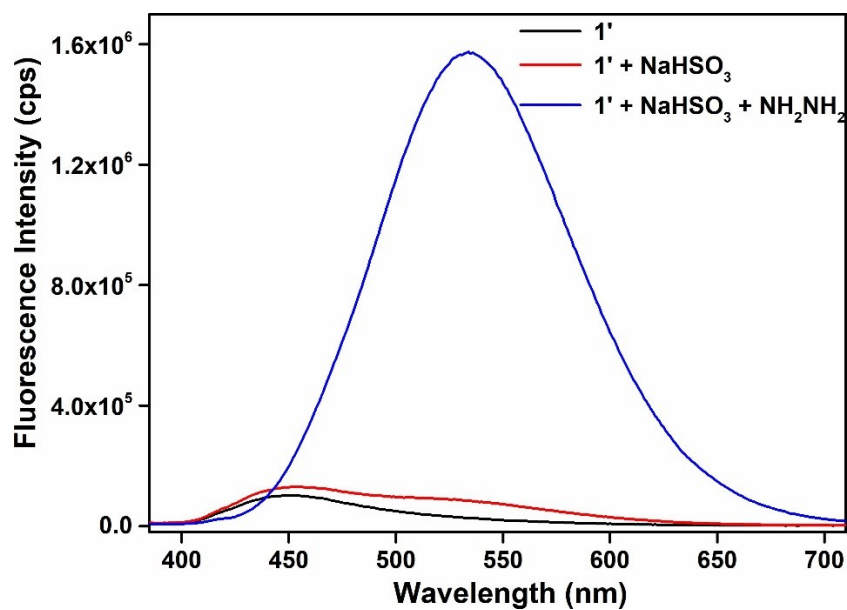

**Figure S16.** Change in the fluorescence emission intensity of **1'** upon addition of 1 mM hydrazine solution (500  $\mu$ L) in presence of 1 mM NaHSO<sub>3</sub> solution (500  $\mu$ L).

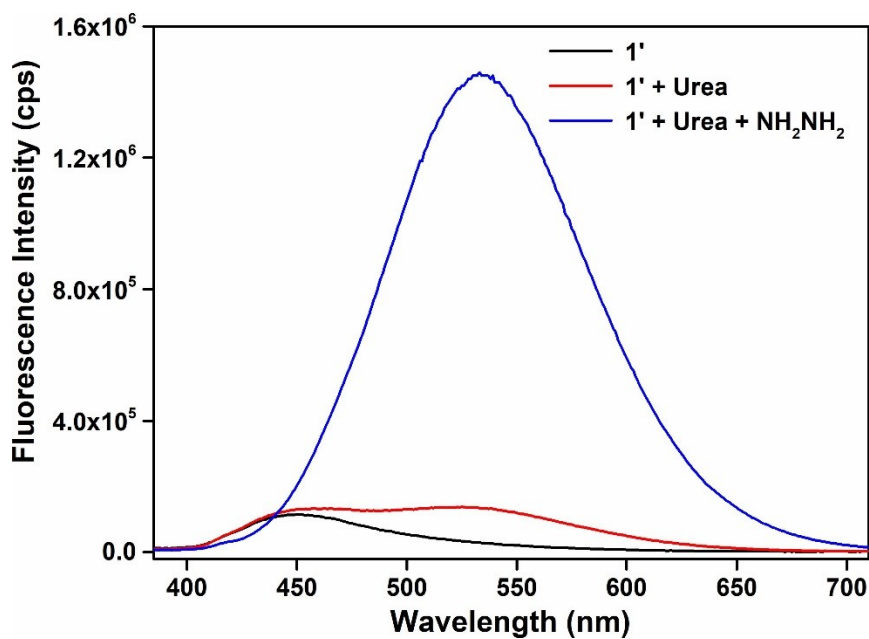

**Figure S17.** Change in the fluorescence emission intensity of **1'** upon addition of 1 mM hydrazine solution (500  $\mu$ L) in presence of 1 mM urea solution (500  $\mu$ L).

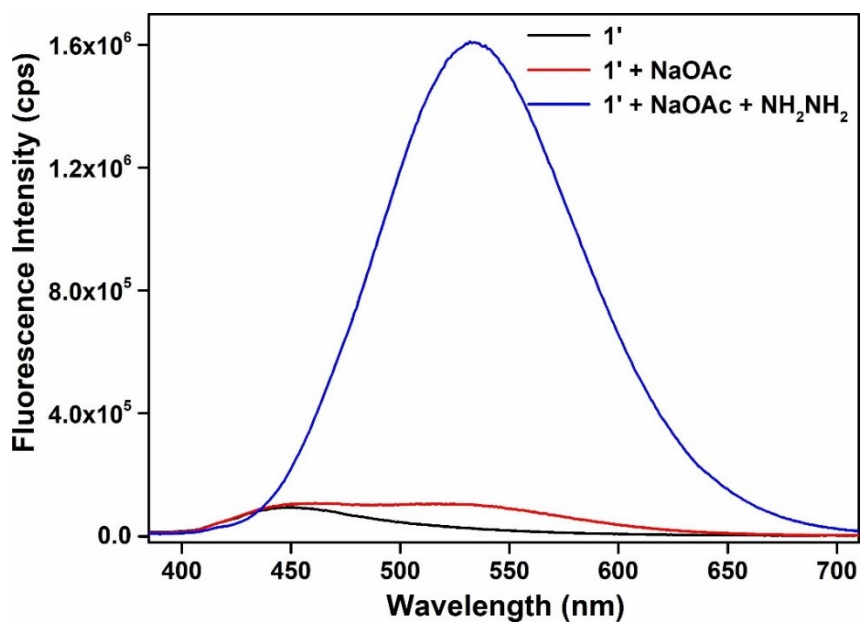

**Figure S18.** Change in the fluorescence emission intensity of **1'** upon addition of 1 mM hydrazine solution (500  $\mu$ L) in presence of 1 mM NaOAc solution (500  $\mu$ L).

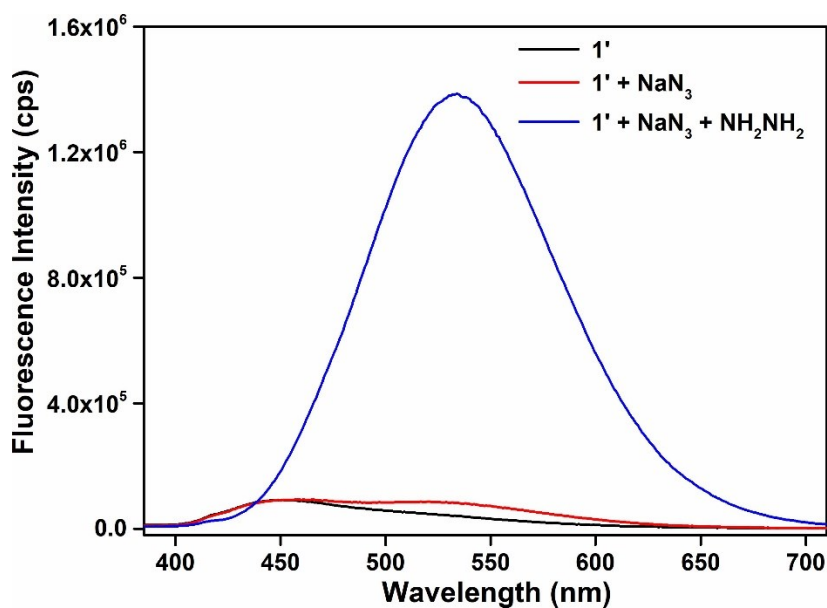

**Figure S19.** Change in the fluorescence emission intensity of **1'** upon addition of 1 mM hydrazine solution (500  $\mu$ L) in presence of 1 mM NaN<sub>3</sub> solution (500  $\mu$ L).

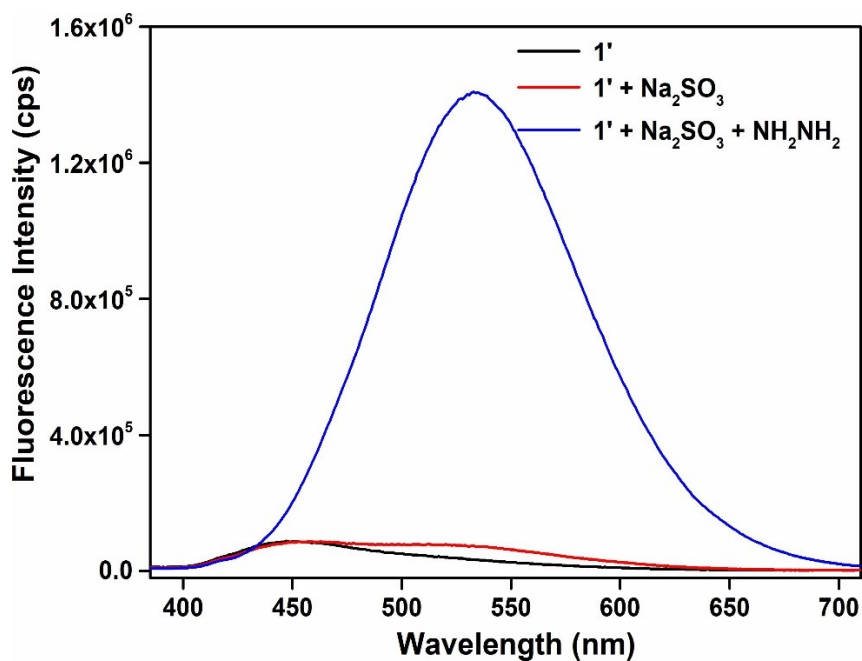

**Figure S20.** Change in the fluorescence emission intensity of **1'** upon addition of 1 mM hydrazine solution (500  $\mu$ L) in presence of 1 mM Na<sub>2</sub>SO<sub>3</sub> solution (500  $\mu$ L).

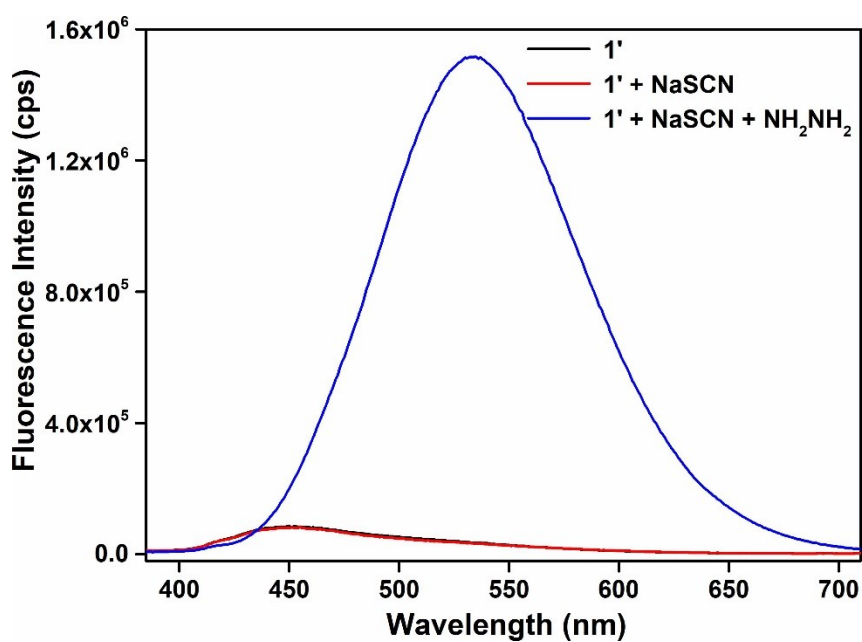

**Figure S21.** Change in the fluorescence emission intensity of **1'** upon addition of 1 mM hydrazine solution (500  $\mu$ L) in presence of 1 mM NaSCN solution (500  $\mu$ L).

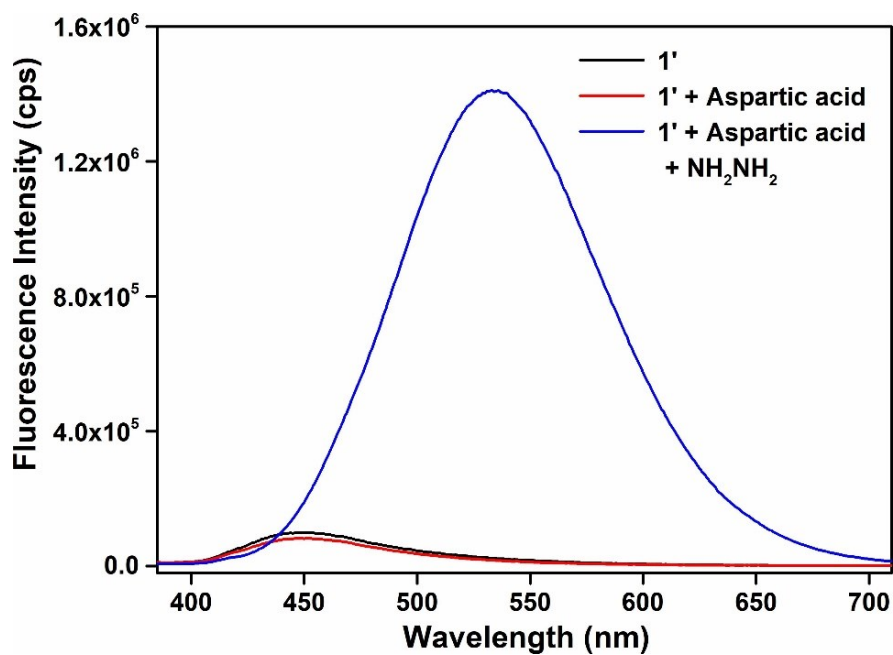

**Figure S22.** Change in the fluorescence emission intensity of **1'** upon addition of 1 mM hydrazine solution (500  $\mu$ L) in presence of 1 mM aspartic acid solution (500  $\mu$ L).

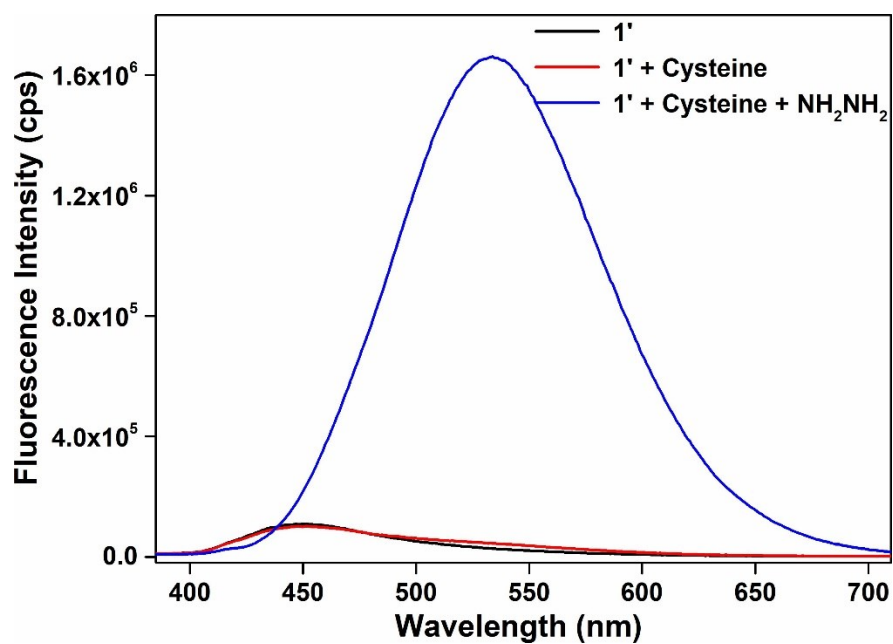

**Figure S23.** Change in the fluorescence emission intensity of **1'** upon addition of 1 mM hydrazine solution (500  $\mu$ L) in presence of 1 mM cysteine solution (500  $\mu$ L).



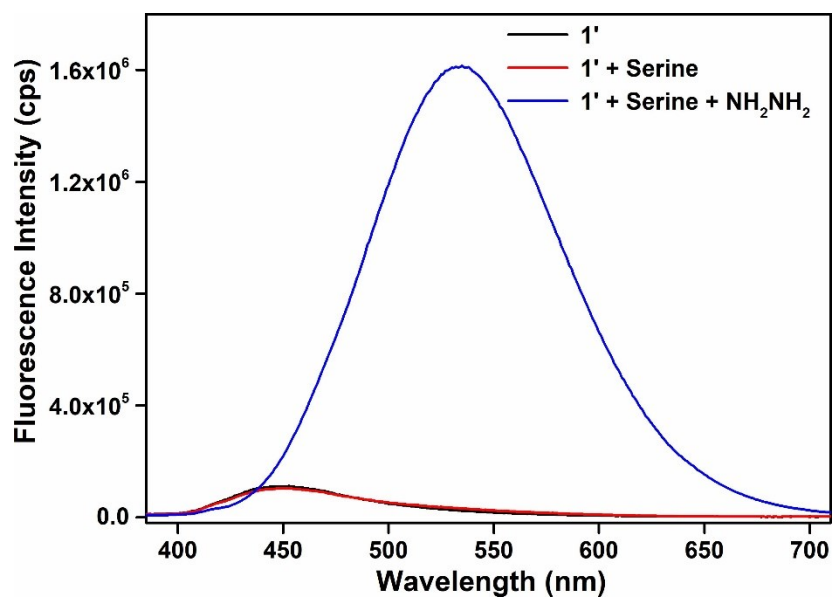

**Figure S24.** Change in the fluorescence emission intensity of **1'** upon addition of 1 mM hydrazine solution (500  $\mu\text{L}$ ) in presence of 1 mM serine solution (500  $\mu\text{L}$ ).

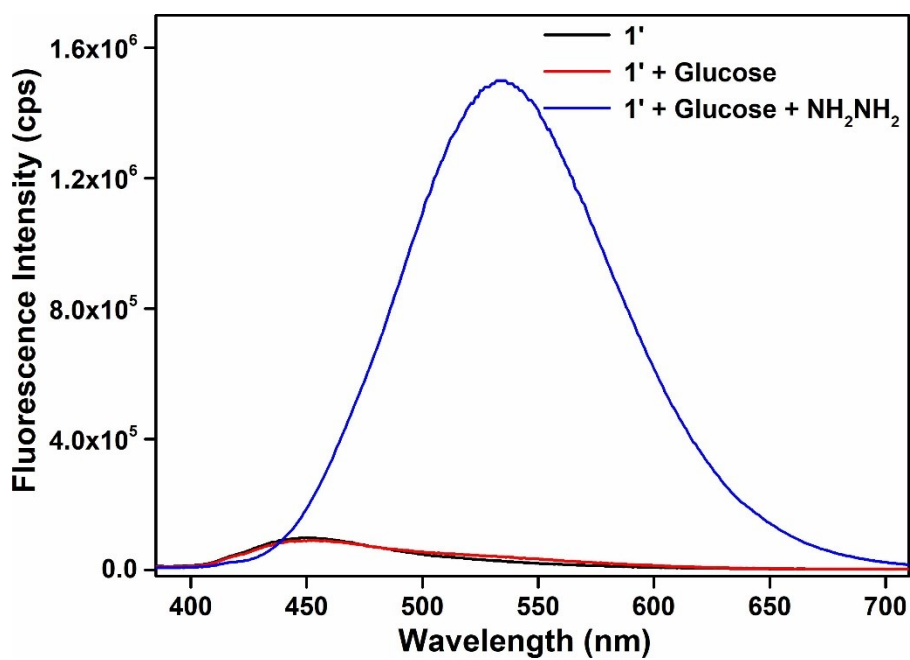

**Figure S25.** Change in the fluorescence emission intensity of **1'** upon addition of 1 mM hydrazine solution (500  $\mu\text{L}$ ) in presence of 1 mM glucose solution (500  $\mu\text{L}$ ).

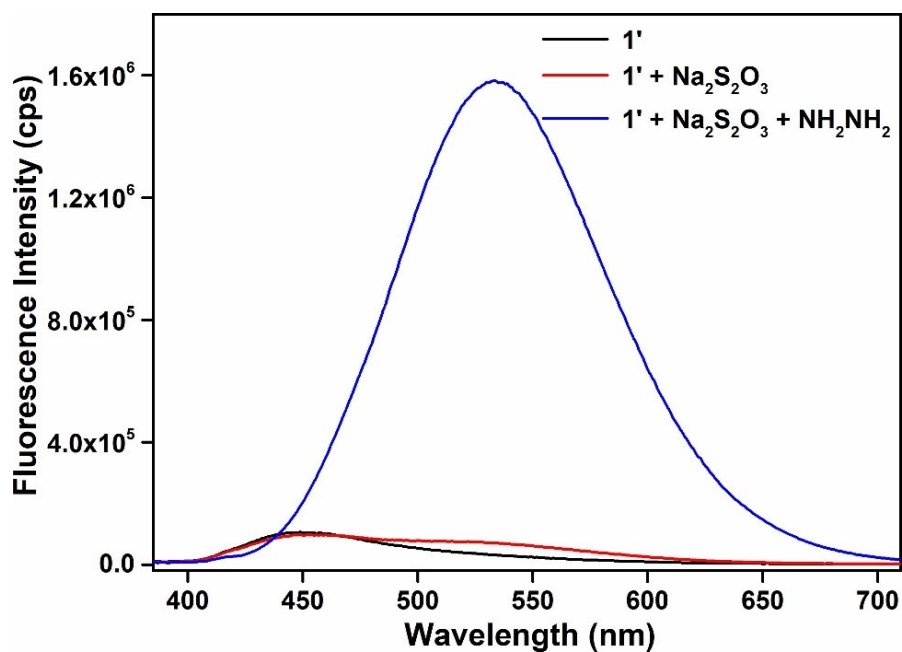

**Figure S26.** Change in the fluorescence emission intensity of **1'** upon addition of 1 mM hydrazine solution (500  $\mu$ L) in presence of 1 mM Na<sub>2</sub>S<sub>2</sub>O<sub>3</sub> solution (500  $\mu$ L).

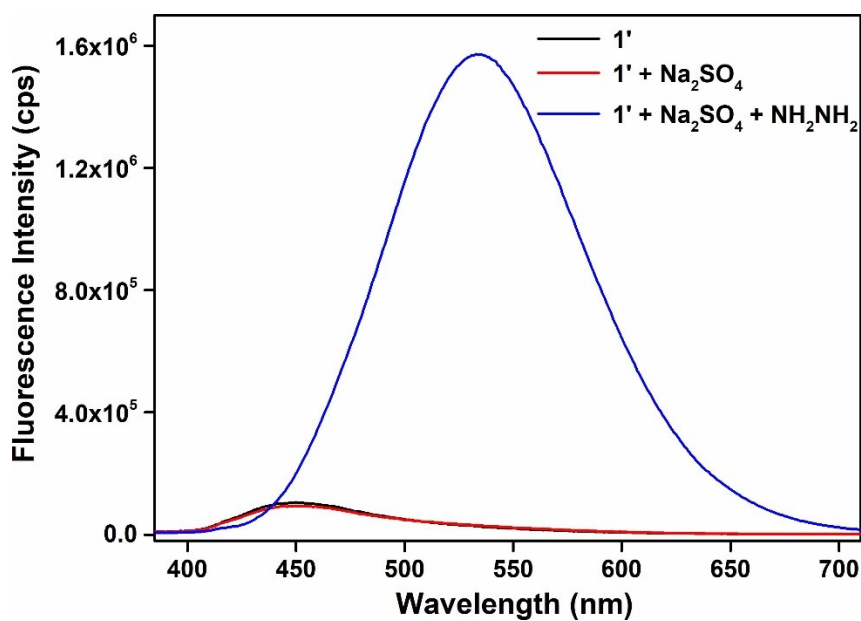

**Figure S27.** Change in the fluorescence emission intensity of **1'** upon addition of 1 mM hydrazine solution (500  $\mu$ L) in presence of 1 mM Na<sub>2</sub>SO<sub>4</sub> solution (500  $\mu$ L).

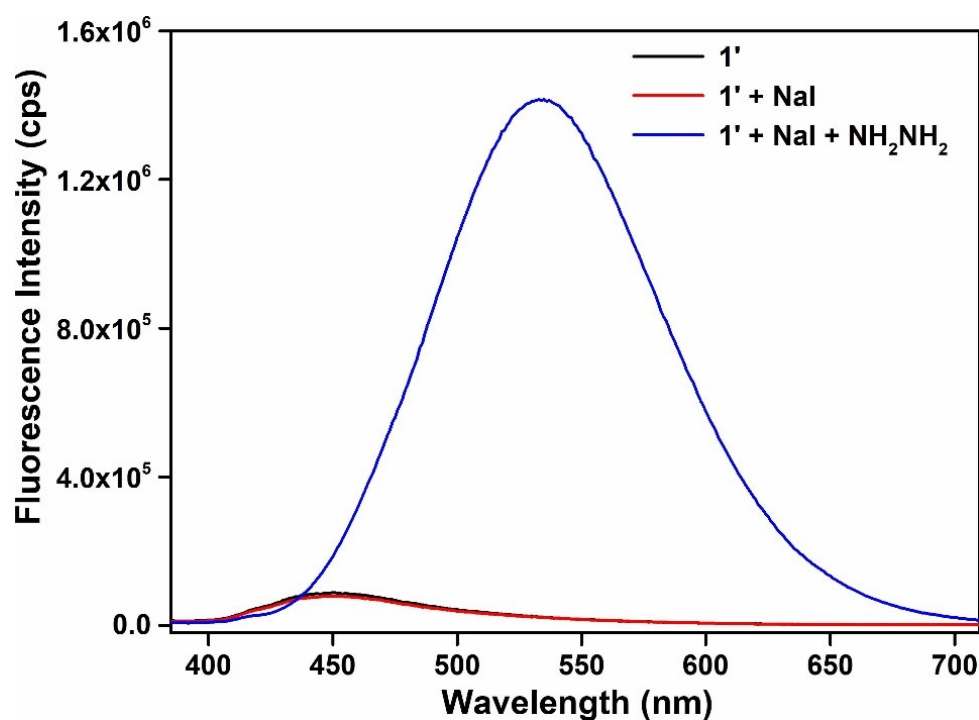

**Figure S28.** Change in the fluorescence emission intensity of **1'** upon addition of 1 mM hydrazine solution (500  $\mu$ L) in presence of 1 mM NaI solution (500  $\mu$ L).

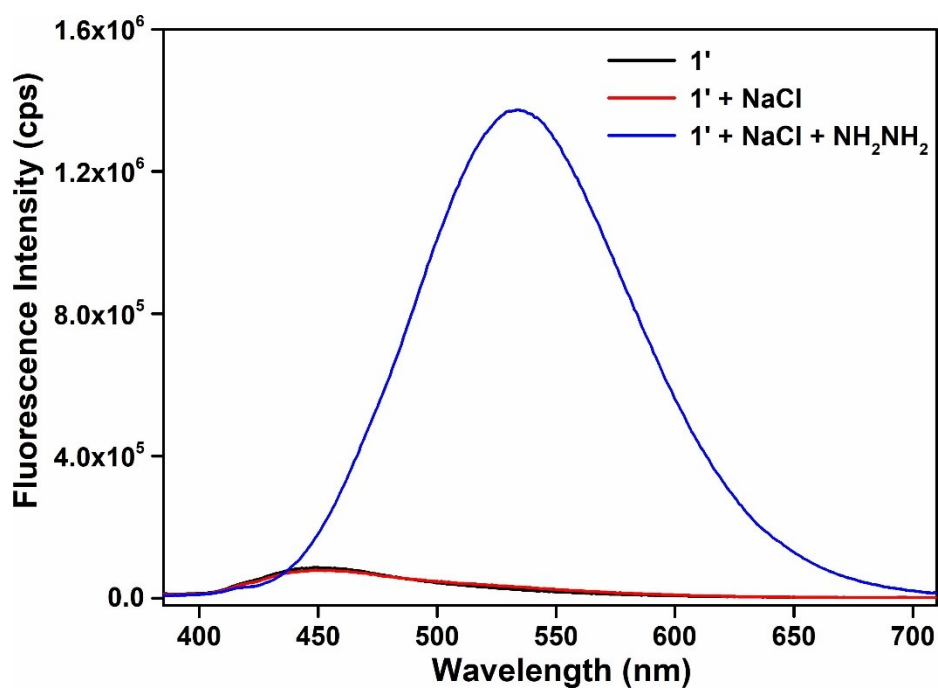

**Figure S29.** Change in the fluorescence emission intensity of **1'** upon addition of 1 mM hydrazine solution (500  $\mu$ L) in presence of 1 mM NaCl solution (500  $\mu$ L).

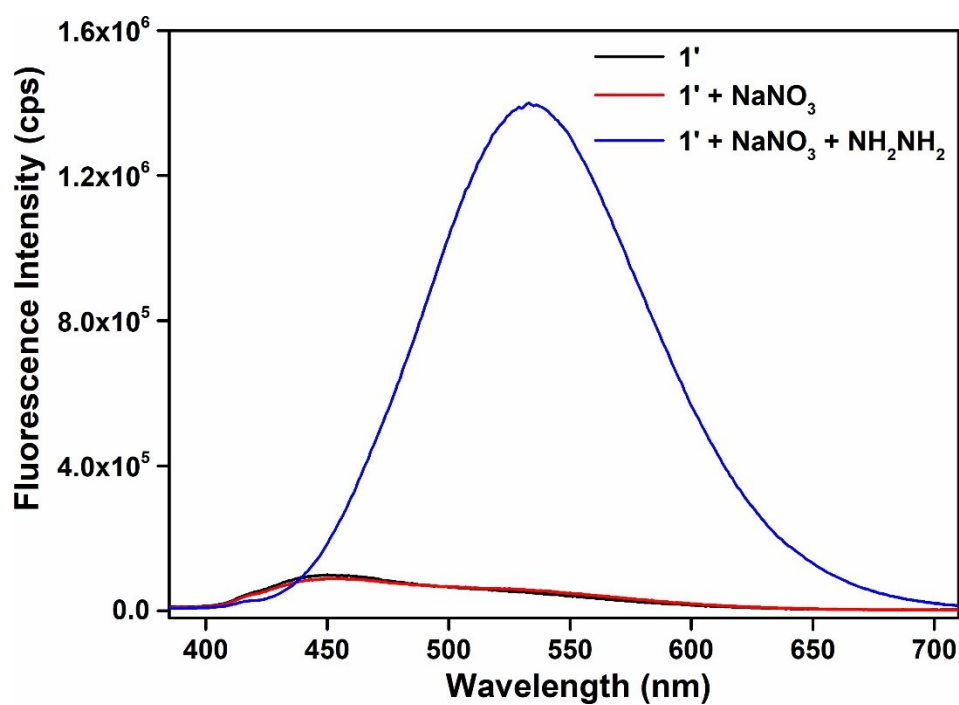

**Figure S30.** Change in the fluorescence emission intensity of **1'** upon addition of 1 mM hydrazine solution (500  $\mu$ L) in presence of 1 mM NaNO<sub>3</sub> solution (500  $\mu$ L).

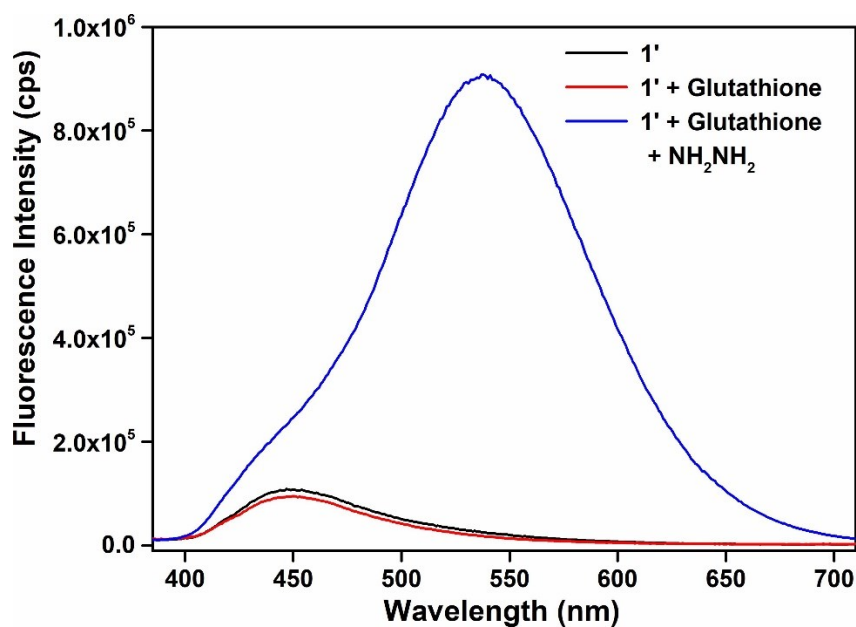

**Figure S31.** Change in the fluorescence emission intensity of **1'** upon addition of 1 mM hydrazine solution (500  $\mu$ L) in presence of 1 mM glutathione solution (500  $\mu$ L).

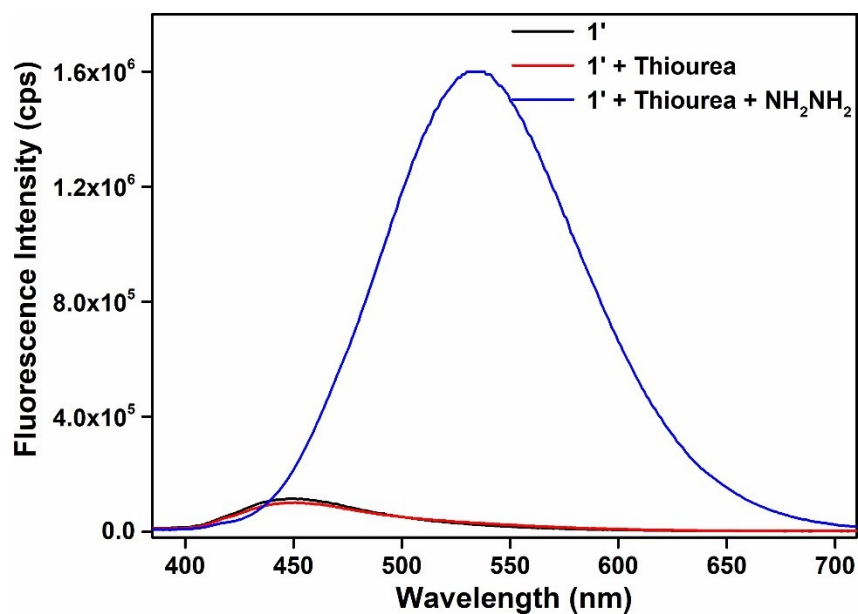

**Figure S32.** Change in the fluorescence emission intensity of **1'** upon addition of 1 mM hydrazine solution (500  $\mu\text{L}$ ) in presence of 1 mM thiourea solution (500  $\mu\text{L}$ ).

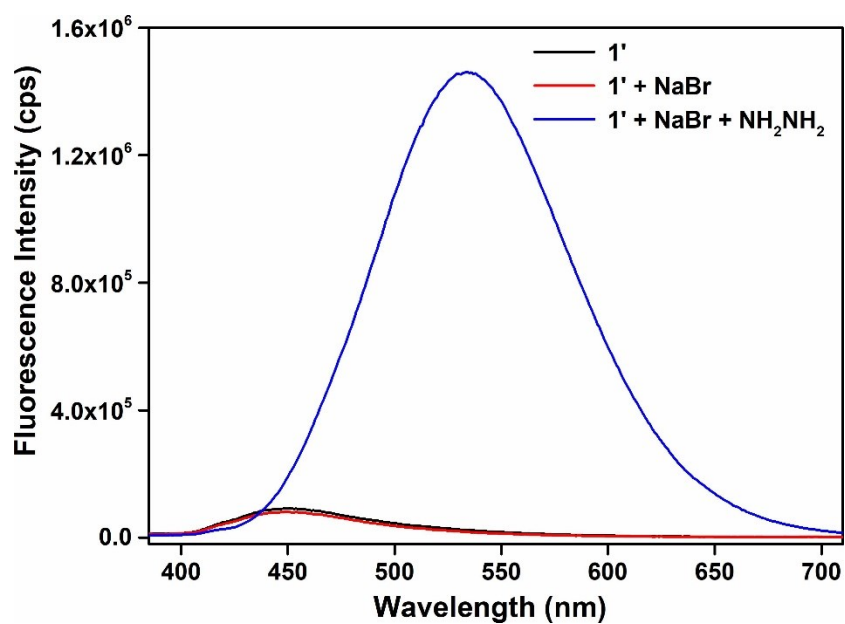

**Figure S33.** Change in the fluorescence emission intensity of **1'** upon addition of 1 mM hydrazine solution (500  $\mu\text{L}$ ) in presence of 1 mM NaBr solution (500  $\mu\text{L}$ ).

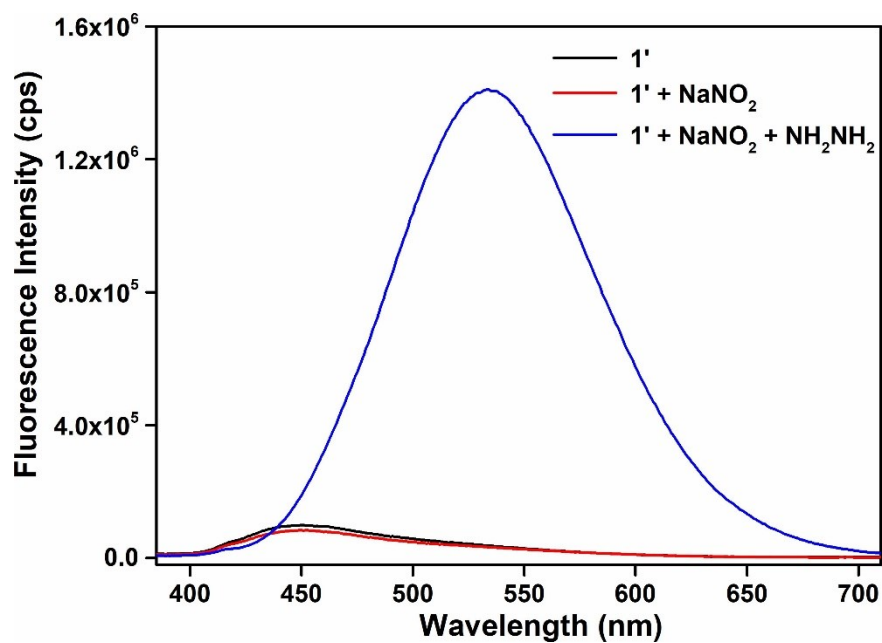

**Figure S34.** Change in the fluorescence emission intensity of **1'** upon addition of 1 mM hydrazine solution (500  $\mu$ L) in presence of 1 mM NaNO<sub>2</sub> solution (500  $\mu$ L).

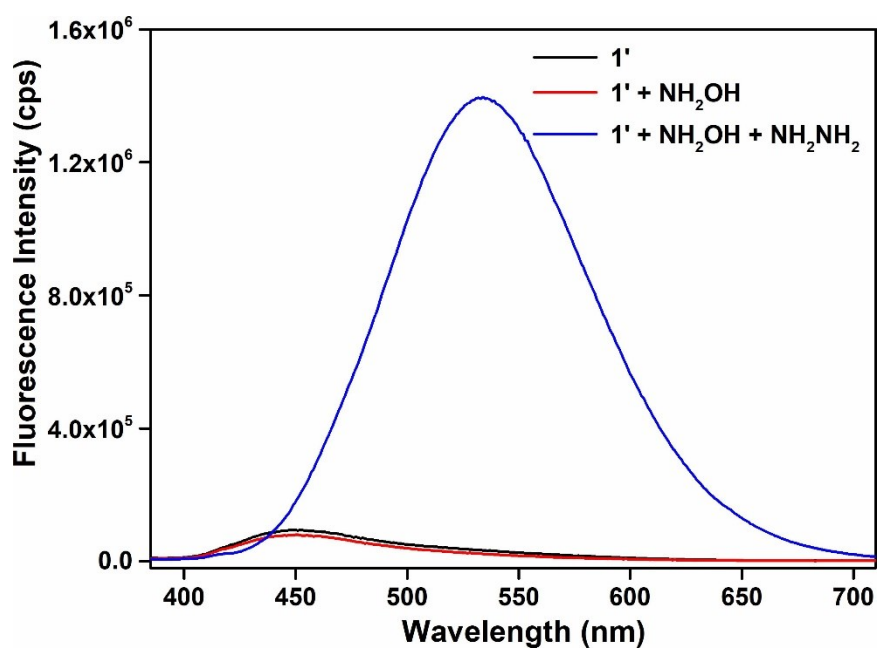

**Figure S35.** Change in the fluorescence emission intensity of **1'** upon addition of 1 mM hydrazine solution (500  $\mu$ L) in presence of 1 mM NH<sub>2</sub>OH solution (500  $\mu$ L).



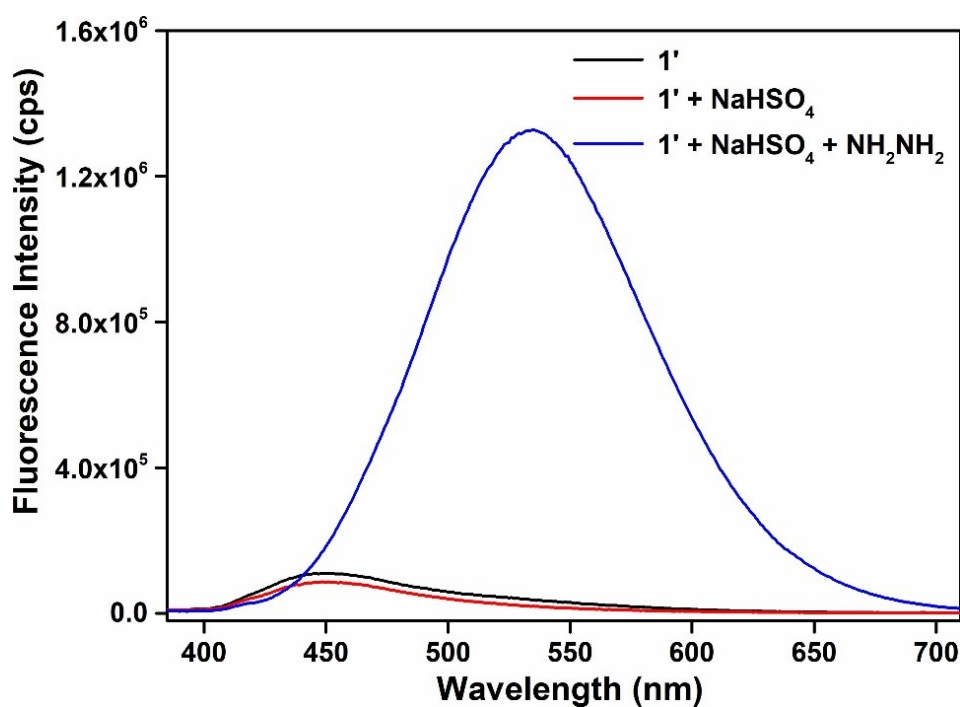

**Figure S36.** Change in the fluorescence emission intensity of **1'** upon addition of 1 mM hydrazine solution (500  $\mu$ L) in presence of 1 mM NaHSO<sub>4</sub> solution (500  $\mu$ L).

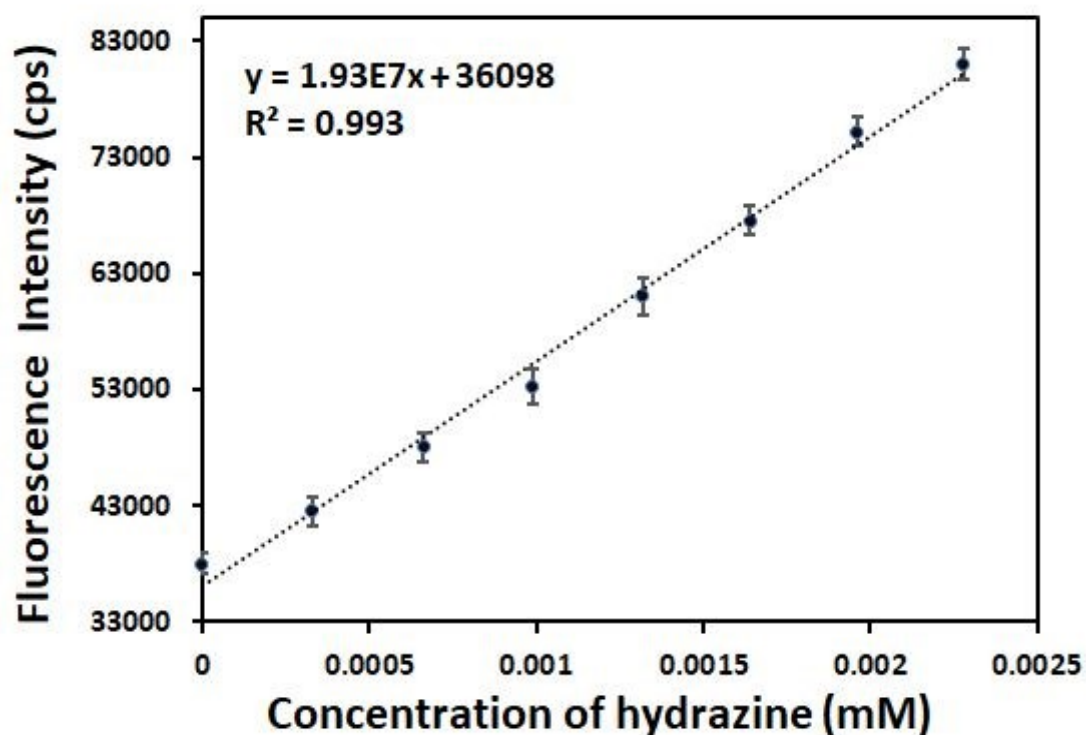

**Figure S37.** Change in the fluorescence emission intensity of **1'** in aqueous medium as a function of hydrazine concentration. The error bars indicate the standard deviations of three measurements.

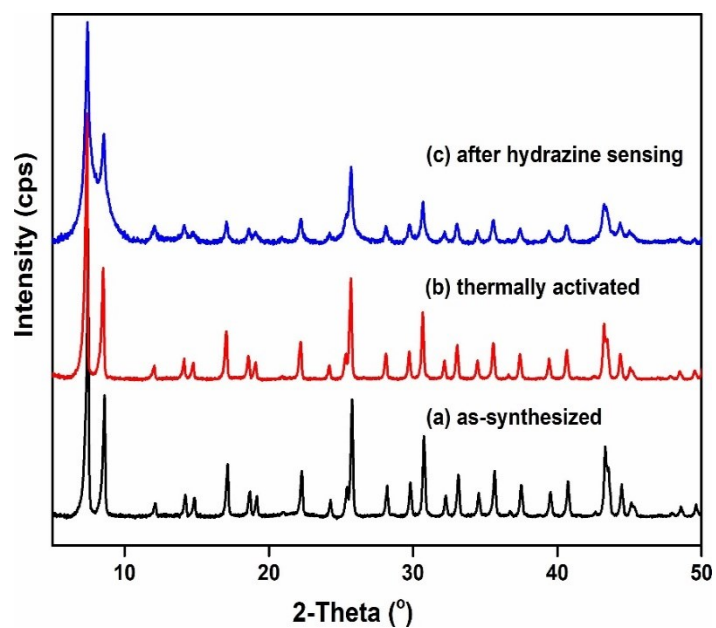

**Figure S38.** XRPD patterns of **1** in different forms: as-synthesized (a), thermally activated (b) and after hydrazine sensing (c).

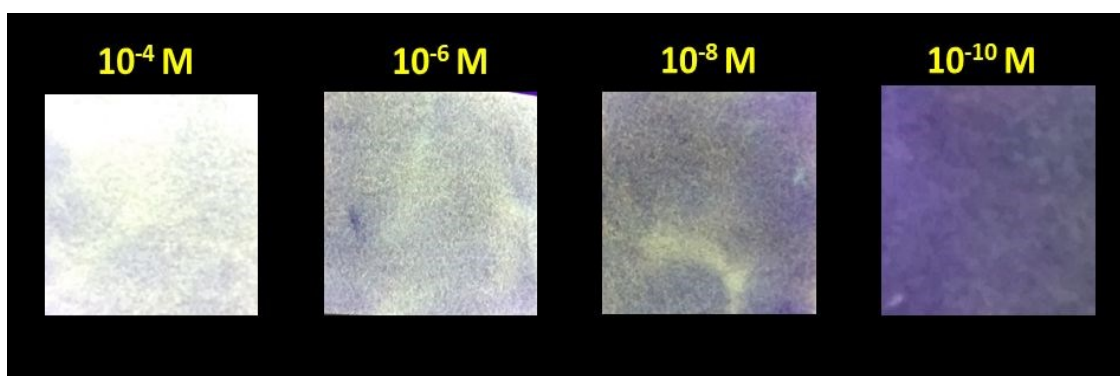

**Figure S39.** Concentration dependent hydrazine sensing in MOF-coated portable paper strip device.

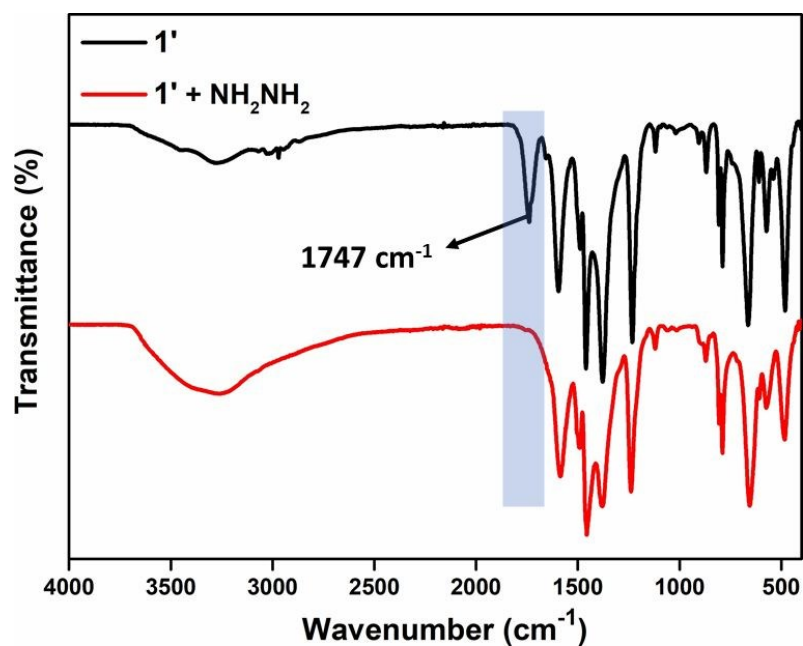

**Figure S40.** FT-IR spectra of **1'** and hydrazine treated **1'** (recovered after sensing).

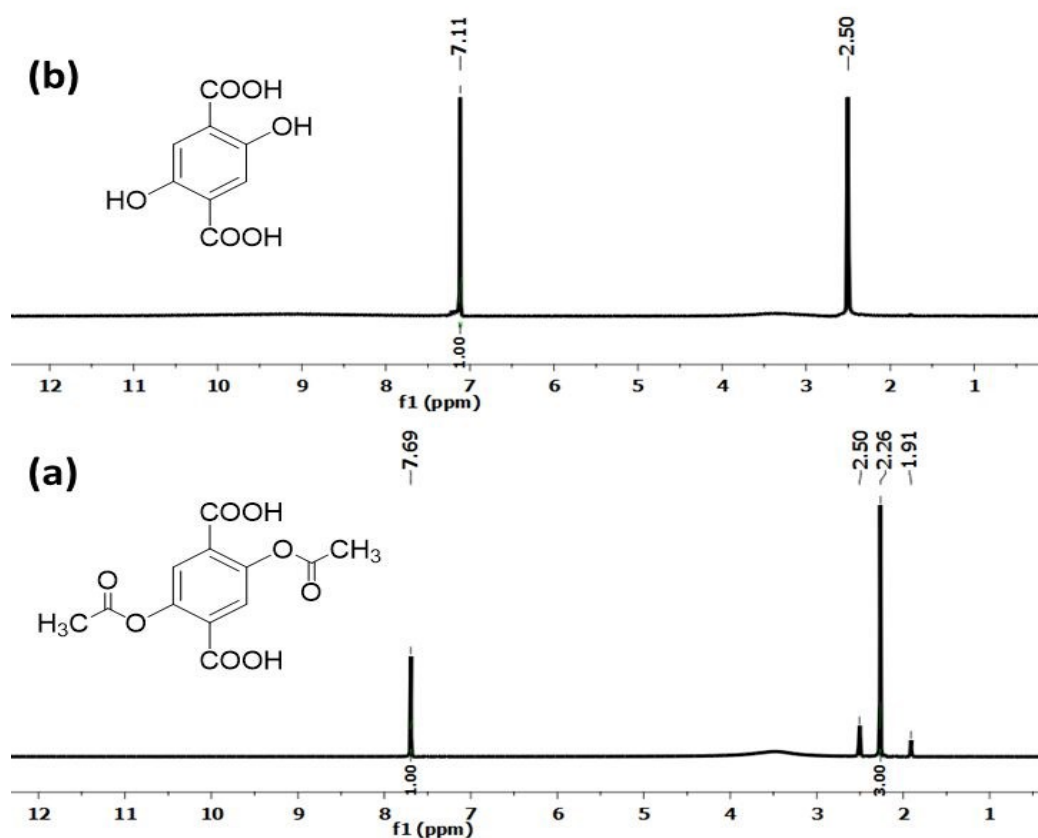

**Figure S41.**  $^1\text{H}$  NMR spectrum of (a)  $\text{H}_2\text{BDC}-(\text{OCOCH}_3)_2$  ligand and (b) hydrazine-treated  $\text{H}_2\text{BDC}-(\text{OCOCH}_3)_2$  ligand in  $\text{DMSO}-d_6$ . Vanishing of signal at 2.26 ppm and up-field shift of aromatic protons from 7.69 ppm to 7.11 ppm signifies the formation of  $\text{H}_2\text{BDC}-(\text{OH})_2$  after treatment with hydrazine.

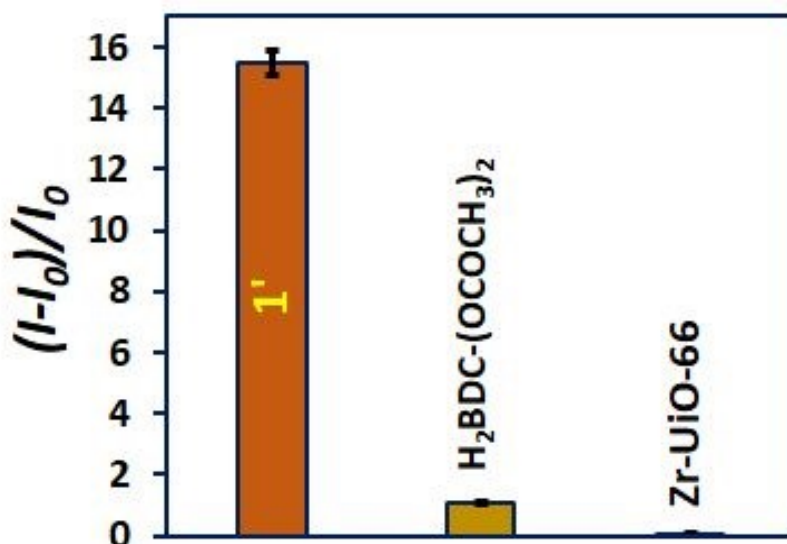

**Figure S42.** Relative fluorescence response of **1'**, H<sub>2</sub>BDC-(OCOCH<sub>3</sub>)<sub>2</sub> ligand and Zr-UiO-66 towards 1 mM hydrazine (500  $\mu$ L) in aqueous medium. The error bars indicate the standard deviations of three measurements.

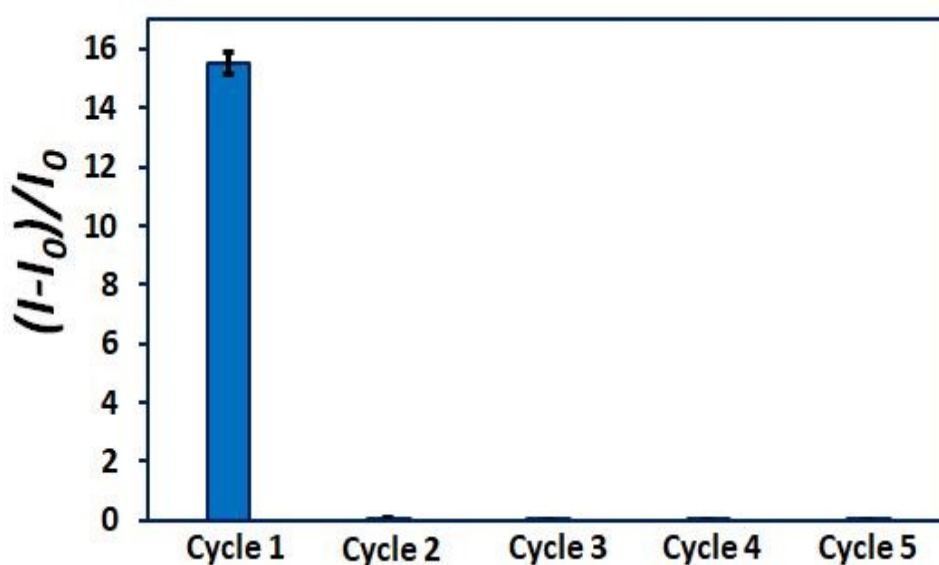

**Figure S43.** Recyclability test for the fluorescence turn-on response of **1'** towards hydrazine. The error bars indicate the standard deviations of three measurements.

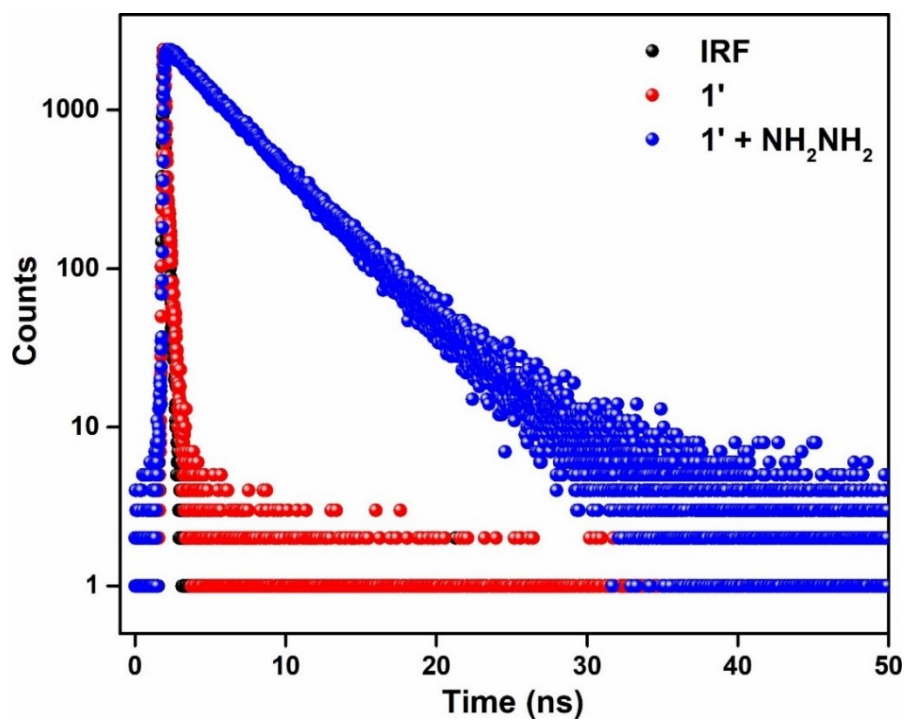

**Figure S44.** Lifetime decay profiles of aqueous suspension of **1'** in absence and presence of hydrazine solution ( $\lambda_{\text{ex}} = 375$  nm, monitored at 535 nm).

**Table S1.** Comparison of the sensing performances of various fluorescent sensors of hydrazine.

| Sl. No. | Sensor                                       | Type of Material     | Sensing Medium | Mode of Detection | Detection Limit | Response Time | Ref.      |
|---------|----------------------------------------------|----------------------|----------------|-------------------|-----------------|---------------|-----------|
| 1       | Zr-UiO-66-(OCOCH <sub>3</sub> ) <sub>2</sub> | MOF                  | water          | turn-on           | 78.8 nM         | seconds       | this work |
| 2       | UiO-66-phmd                                  | MOF                  | HEPES buffer   | turn-on           | 0.87 $\mu$ M    | 20 min        | 4         |
| 3       | BTI                                          | organic-molecule     | HEPES buffer   | turn-on           | 2.9 ppb         | 20 min        | 5         |
| 4       | HyP-1                                        | organic-molecule     | PBS buffer     | turn-on           | 0.035 ppb       | 1 h           | 6         |
| 5       | P1                                           | organic-molecule     | PBS buffer     | turn-on           | 1.79 nM         | 40 s          | 7         |
| 6       | BPB                                          | BODIPY-based organic | HEPES buffer   | turn-off          | 1.87 $\mu$ M    | -             | 8         |

|    |                                  |                                               |                                            |             |                              |           |    |
|----|----------------------------------|-----------------------------------------------|--------------------------------------------|-------------|------------------------------|-----------|----|
|    |                                  | molecule                                      |                                            |             |                              |           |    |
| 7  | Naphsulf-O                       | organic-molecule                              | PBS buffer                                 | turn-on     | 22 nM                        | 40 min    | 9  |
| 8  | BBHC                             | organic-molecule                              | PBS buffer                                 | turn-on     | 0.43 $\mu$ M                 | 1 min     | 10 |
| 9  | CFAc                             | organic-molecule                              | PBS buffer                                 | ratiometric | 0.0474 $\mu$ M               | -         | 11 |
| 10 | BI-E                             | near-infrared fluorescent probe               | PBS buffer                                 | turn-on     | 0.057 $\mu$ M                | 1 min     | 12 |
| 11 | NA-N <sub>2</sub> H <sub>4</sub> | naphthalimide based organic molecule          | HEPES buffer                               | ratiometric | 9.4 nM                       | 15 min    | 13 |
| 12 | TAPHP                            | organic-molecule                              | HEPES buffer                               | ratiometric | 0.3 $\mu$ M                  | 60 min    | 14 |
| 13 | AB-NDI                           | organic-molecule                              | DMSO                                       | turn-on     | -                            | -         | 15 |
| 14 | TNQ                              | organic-molecule                              | PBS buffer                                 | ratiometric | -                            | -         | 16 |
| 15 | HBTM                             | organic-molecule                              | PBS buffer                                 | turn-on     | 29 $\mu$ M                   | 55 min    | 17 |
| 16 | NAC                              | naphthalene based organic molecule            | HEPES buffer                               | turn-on     | 4.5 $\mu$ M                  | 4 min     | 18 |
| 17 | DPA                              | organic-molecule                              | DMSO/ PBS buffer solution (4/6, v/v)       | turn-on     | 1.9 nM                       | 8 min     | 19 |
| 18 | probe 1<br>probe 2               | pyrene- and anthracene-based organic molecule | HEPES buffer                               | turn-on     | 0.17 $\mu$ M<br>0.24 $\mu$ M | 3 min     | 20 |
| 19 | SF-Azo compounds                 | organic-molecule                              | CH <sub>3</sub> OH/ H <sub>2</sub> O (v/v) | turn-on     | 2.33 mM                      | 18-42 min | 21 |



|    |                                  |                  |                                                 |                             |              |         |    |
|----|----------------------------------|------------------|-------------------------------------------------|-----------------------------|--------------|---------|----|
|    |                                  |                  | = 1:1)                                          |                             |              |         |    |
| 20 | levulinated hydroxy-coumarin 1   | organic-molecule | acetate buffer                                  | turn-on                     | 2.46 $\mu$ M | 15 min  | 22 |
| 21 | Compound <b>6a</b>               | organic-molecule | HEPES/DMSO (1:1, v/v)                           | “turn-on” and “ratiometric” | 0.19 $\mu$ M | -       | 23 |
| 22 | NS-N <sub>2</sub> H <sub>4</sub> | organic-molecule | PBS/DMSO (v/v = 2/1)                            | turn-on                     | -            | 240 min | 24 |
| 23 | PBF                              | organic-molecule | CH <sub>3</sub> CN–H <sub>2</sub> O (6:4, v/v), | turn-on                     | 0.41 $\mu$ M | 1 min   | 25 |

**Table S2.** Unit cell parameters of the as-synthesized Zr-UiO-66-(OCOCH<sub>3</sub>)<sub>2</sub> MOF. The obtained values are compared with the previously reported Zr-UiO-66 MOFs.

| Compound Name                 | Zr-UiO-66-(OCOCH <sub>3</sub> ) <sub>2</sub> MOF ( <b>1'</b> ) (this work) | Zr-UiO-66 MOF (reported) <sup>26</sup> | Zr-UiO-66-NH-CH <sub>2</sub> -Py MOF (reported) <sup>27</sup> | Zr-UiO-66-1-(aminomethyl)naphthalen-2-ol (reported) <sup>28</sup> |
|-------------------------------|----------------------------------------------------------------------------|----------------------------------------|---------------------------------------------------------------|-------------------------------------------------------------------|
| Crystal System                | cubic                                                                      | cubic                                  | cubic                                                         | cubic                                                             |
| a = b = c (Å)                 | 20.840(7)                                                                  | 20.7004 (2)                            | 20.755(3)                                                     | 20.786(3)                                                         |
| $\alpha = \beta = \gamma$ (°) | 90                                                                         | 90                                     | 90                                                            | 90                                                                |
| V (Å <sup>3</sup> )           | 9051.7(5)                                                                  | 8870.3(2)                              | 8940.3(21)                                                    | 8981.1(19)                                                        |

**Table S3.** Calculation of detection limit for hydrazine detection by **1'**.

| Number of Run (n) | Fluorescence Intensities at 535 nm before addition of hydrazine | Standard Deviation ( $\sigma$ ) | Slope ( $k$ ) (mM <sup>-1</sup> ) | Detection Limit ( $3\sigma/k$ ) (mM)            |
|-------------------|-----------------------------------------------------------------|---------------------------------|-----------------------------------|-------------------------------------------------|
| 1                 | 37276.92401                                                     | 509.41                          | 19374748                          | $7.88 \times 10^{-5}$<br>(78.8 nM)<br>(3.9 ppb) |
| 2                 | 38905.85504                                                     |                                 |                                   |                                                 |
| 3                 | 38773.16733                                                     |                                 |                                   |                                                 |
| 4                 | 39000.68352                                                     |                                 |                                   |                                                 |
| 5                 | 38704.43693                                                     |                                 |                                   |                                                 |
| 6                 | 38620.54759                                                     |                                 |                                   |                                                 |
| 7                 | 38774.00126                                                     |                                 |                                   |                                                 |
| 8                 | 38635.82115                                                     |                                 |                                   |                                                 |

**Table S4.** Fluorescence lifetimes of aqueous suspension of **1'** before and after the addition of hydrazine solution ( $\lambda_{\text{ex}} = 375$  nm, pulsed diode laser).

| Volume of 1 mM NH <sub>2</sub> NH <sub>2</sub> solution added ( $\mu$ L) | $a_1$ | $a_2$ | $\tau_1$ (ns) | $\tau_2$ (ns) | $\langle\tau\rangle^*$ (ns) | $\chi^2$ |
|--------------------------------------------------------------------------|-------|-------|---------------|---------------|-----------------------------|----------|
| 0                                                                        | 0.64  | 0.36  | 0.08          | 0.31          | 0.16                        | 1.06     |
| 500                                                                      | 0.96  | 0.04  | 4.33          | 8.88          | 4.47                        | 1.12     |

\*  $\langle\tau\rangle = a_1\tau_1 + a_2\tau_2$

## References

1. J. Liu, Y. Xu, P. B. Groszewicz, M. Brodrecht, C. Fasel, K. Hofmann, X. Tan, T. Gutmann and G. Buntkowsky, *Catal. Sci. Technol.*, 2018, **8**, 5190-5200.
2. A. Boultif and D. J. Louer, *J. Appl. Crystallogr.*, 1991, **24**, 987-993.
3. Stoe and C. GmbH, STOE WinXPOW version 2.11, Darmstadt, Germany, 2005.
4. M. SK, M. R. U. Z. Khan, A. Das, S. Nandi, V. Trivedi and S. Biswas, *Dalton Trans.*, 2019, **48**, 12615-12621.
5. R. Maji, A. K. Mahapatra, K. Maiti, S. Mondal, S. S. Ali, P. Sahoo, S. Mandal, M. R. Uddin, S. Goswami, C. K. Quah and H.-K. Fun, *RSC Adv.*, 2016, **6**, 70855-70862.
6. Y. Jung, I. G. Ju, Y. H. Choe, Y. Kim, S. Park, Y.-M. Hyun, M. S. Oh and D. Kim, *ACS Sens.*, 2019, **4**, 441-449.
7. Shweta, A. Kumar, Neeraj, S. K. Asthana, A. Prakash, J. K. Roy, I. Tiwari and K. K. Upadhyay, *RSC Adv.*, 2016, **6**, 94959-99496.

8. A. K. Mahapatra, R. Maji, K. Maiti, S. K. Manna, S. Mondal, S. S. Ali, S. Manna, P. Sahoo, S. Mandal, M. R. Uddin and D. Mandal, *RSC Adv.*, 2015, **5**, 58228-58236.
9. W. Chen, W. Liu, X.-J. Liu, Y.-Q. Kuang, R.-Q. Yu and J.-H. Jiang, *Talanta*, 2017, **162**, 225-231.
10. S. Paul, R. Nandi, K. Ghoshal, M. Bhattacharyya and D. K. Maiti, *New J. Chem.*, 2019, **43**, 3303-3330.
11. Z. Zhang, Z. Zhuang, L. L. Song, X. Lin, S. Zhang, G. Zheng and F. Zhan, *J. Photochem. Photobiol. A*, 2018, **358**, 10-16.
12. J. Ma, J. Fan, H. Li, Q. Yao, J. Xia, J. Wang and X. Peng, *Dyes Pigm.*, 2017, **138**, 39-46.
13. X. Xia, F. Zeng, P. Zhang, J. Lyu, Y. Huang and S. Wu, *Sens. Actuators, B*, 2017, **227**, 411-418.
14. Z. Luo, B. Liu, T. Qin, K. Zhu, C. Zhao, C. Pan and L. Eang, *Sens. Actuators, B*, 2018, **263**, 229-236.
15. D. Zhou, Y. Wang, J. Jia, W. Yu, B. Qu, X. Li and X. Sun, *Chem. Commun.*, 2015, **51**, 10656-10659.
16. S. Yu, S. Wang, H. Yu, Y. Feng, S. Zhang, M. Zhu, H. Yin and X. Meng, *Sens. Actuators, B*, 2015, **220**, 1338-1345.
17. Z. Chen, X. Zhong, W. Qu, T. Shi, H. Liu, H. He, X. Zhang and S. Wang, *Tetrahedron Lett.*, 2017, **58**, 2596-2601.
18. S. Goswami, A. K. Das, U. Saha, S. Maity, K. Khanra and N. Bhattacharyya, *Org. Biomol. Chem.*, 2015, **13**, 2134-2139.
19. Y. Zhang, Y. Huang, Y. Yue, J. Chao, F. Huo and C. Yin, *Sens. Actuators, B*, 2018, **273**, 944-950.
20. B. Roy, S. Halder, A. Guha and S. Bandyopadhyay, *Anal. Chem.*, 2017, **89**, 10625-10636.
21. M. C. Shin, Y. Lee, S. B. Park and E. Kim, *ACS Omega*, 2019, **4**, 14875-14885.
22. M. G. Choi, J. Hwang, J. O. Moon, J. Sung and S.-K. Chang, *Org. Lett.*, 2011, **13**, 5260-5263.
23. D. Purohit, C. P. Sharma, A. Raghuvanshi, A. Jain, K. S. Rawat, N. M. Gupta, J. Singh, M. Sachdev and A. Goel, *Chem. Eur. J.*, 2019, **25**, 4660-4664.
24. J.-Y. Wang, Z.-R. Liu, M. Ren and W. Lin, *Sci. Rep.*, 2017, **7**, 1-8.
25. S. Goswami, S. Paul and A. Manna, *New J. Chem.*, 2015, **39**, 2300-2305.
26. J. H. Cavka, S. Jakobsen, U. Olsbye, N. Guillou, C. Lamberti, S. Bordiga and K. P. Lillerud, *J. Am. Chem. Soc.*, 2008, **130**, 13850-13851.
27. A. Das, N. Anbu, M. SK, A. Dhakshinamoorthy and S. Biswas, *Dalton Trans.*, 2019, **48**, 17371-17380.
28. A. Das, N. Anbu, M. SK, A. Dhakshinamoorthy and S. Biswas, *ChemCatChem*, 2020, **12**, 1789-1798.
